# Supplementary material for: Three Novel Bacteriophages, J5a, F16Ba, and z1a, Specific for Bacillus anthracis, Define a New Clade of Historical Wbeta Phage Relatives
Source: MDPI journal article supplement (doi:10.3390/v14020213), 2022-01-21
Supplement: s1 [file s1]

**Table S1.** List of bacterial strains used in the study.

| Species<br>(No.)                | Strain                  | Obtained from                                                       | Notes                                         |
|---------------------------------|-------------------------|---------------------------------------------------------------------|-----------------------------------------------|
| <i>B. cereus</i><br>(11)        | ATCC 10872              | MIHE institute collection                                           |                                               |
|                                 | ATCC 10876              | The University of Scranton, Pennsylvania, USA                       |                                               |
|                                 | ATCC 11778              |                                                                     |                                               |
|                                 | ATCC 13472              | The University of Scranton, Pennsylvania, USA                       |                                               |
|                                 | ATCC 14579 <sup>T</sup> | The University of Scranton, Pennsylvania, USA                       |                                               |
|                                 | ATCC 19637              | The University of Scranton, Pennsylvania, USA                       |                                               |
|                                 | ATCC 23261              | The University of Scranton, Pennsylvania, USA                       |                                               |
|                                 | F16959                  | The University of Scranton, Pennsylvania, USA                       |                                               |
|                                 | F17202                  | The University of Scranton, Pennsylvania, USA                       |                                               |
|                                 | F17289                  | The University of Scranton, Pennsylvania, USA                       |                                               |
|                                 | UW85                    | The University of Scranton, Pennsylvania, USA                       |                                               |
| <i>B. thuringiensis</i><br>(11) | ATCC 33679              | MIHE institute collection                                           |                                               |
|                                 | ATCC 35646              | The University of Scranton, Pennsylvania, USA                       |                                               |
|                                 | ATCC 10792              |                                                                     |                                               |
|                                 | ATCC 10792 <sup>T</sup> | MIHE institute collection                                           |                                               |
|                                 | T07-019                 | The University of Scranton, Pennsylvania, USA                       |                                               |
|                                 | T07-128                 | The University of Scranton, Pennsylvania, USA                       |                                               |
|                                 | T07-146                 |                                                                     |                                               |
|                                 | T07-151                 |                                                                     |                                               |
|                                 | T07-155                 | The University of Scranton, Pennsylvania, USA                       |                                               |
|                                 | T07-202                 | The University of Scranton, Pennsylvania, USA                       |                                               |
|                                 | #35                     | The University of Scranton, Pennsylvania, USA                       |                                               |
| <i>B. anthracis</i><br>(5)      | 211                     | Institute of Veterinary Hygiene in Białystok, field office in Łomża | Isolated from spleen of a cow died of anthrax |
|                                 | 34F2                    | "Antraphyl" vaccine by Phylaxia-Sanofi                              | Serial no. 021OE2                             |
|                                 | 1153                    |                                                                     | Isolated from a died cow                      |
|                                 | 1583                    | The University of Scranton, Pennsylvania, USA                       | Strain 211 clone                              |
|                                 | PZH                     | National Institute of Public Health - National Institute of Hygiene |                                               |
| <i>B. mycoides</i><br>(3)       | ATCC 6462               |                                                                     |                                               |
|                                 | ATCC 21929              | The University of Scranton, Pennsylvania, USA                       |                                               |
|                                 | K184                    | The University of Scranton, Pennsylvania, USA                       |                                               |
| <i>B. sp. Ba 813+</i><br>(10)   | #6 (I/2)                | The University of Scranton, Pennsylvania, USA                       |                                               |
|                                 | #7 (II/3)               | The University of Scranton, Pennsylvania, USA                       |                                               |
|                                 | #12 (S8553/2)           | The University of Scranton, Pennsylvania, USA                       |                                               |
|                                 | #16 (PJ572)             | The University of Scranton, Pennsylvania, USA                       |                                               |
|                                 | #17 (094)               | The University of Scranton, Pennsylvania, USA                       |                                               |
|                                 | #21 (T1197-77)          | The University of Scranton, Pennsylvania, USA                       |                                               |
|                                 | #28 (3)                 | The University of Scranton, Pennsylvania, USA                       |                                               |
|                                 | #30 (1B)                | The University of Scranton, Pennsylvania, USA                       |                                               |
|                                 | #31                     | The University of Scranton, Pennsylvania, USA                       |                                               |
|                                 | #3403                   | The University of Scranton, Pennsylvania, USA                       |                                               |
| <i>B. subtilis</i>              | ATCC 6633               | The University of Scranton, Pennsylvania, USA                       |                                               |

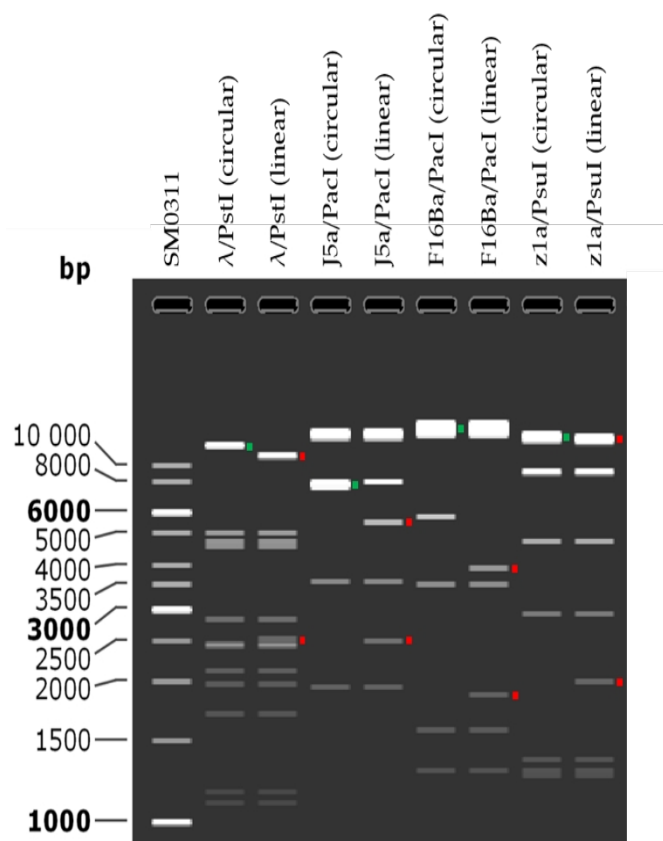

**Figure S1.** DNA restriction patterns generated *in silico* by SnapGene for Lambda, J5a, F16Ba, and z1a phages, indicating expected differences between restricted DNA untreated (circular forms) and treated with heat (linear forms). DNA ladder used – SM0311 Thermo Scientific GeneRuler 1 kb.

**Table S2.** Bacteriophage J5a genes and their predicted products. The coverage (in %) and identity (in %) of each protein with its closest homolog from the RefSeq database is as calculated with BLASTp. If no close viral homolog was found bacterial homologs were included. Signal peptides and transmembrane domains are indicated as SP and TMD, respectively.

| ORF No. | ORF position (bp) | Length of product (aa)/Predicted molecular mass (kDa) | pI   | Predicted function                                   | The closest homolog in GenBank (GenBank acc. no.) | Coverage (%) | Identity (%) | Protein identifier (PHMMER results) |
|---------|-------------------|-------------------------------------------------------|------|------------------------------------------------------|---------------------------------------------------|--------------|--------------|-------------------------------------|
| 1.      | 63-548            | 161/18.43                                             | 9.92 | Terminase small subunit                              | <i>B. anthracis</i> phage Gamma (ABB55435.1)      | 100          | 98.14        | Terminase_4                         |
| 2.      | 545-2242          | 565/65.04                                             | 5.03 | Terminase large subunit                              | <i>B. anthracis</i> phage Negev_SA (ARW58459.1)   | 100          | 99.47        | Terminase_1                         |
| 3.      | 2258-3556         | 432/48.82                                             | 6.23 | Portal protein                                       | <i>B. anthracis</i> phage Fah (YP_512313.1)       | 99           | 97.90        | Phage_portal                        |
| 4.      | 3519-4139         | 206/23.68                                             | 5.11 | Prohead protease                                     | <i>B. anthracis</i> phage Gamma (ABB55432.1)      | 100          | 98.06        | Peptidase_S78                       |
| 5.      | 4178-5356         | 392/44.42                                             | 5.04 | Major capsid protein                                 | <i>B. anthracis</i> phage AP631 (AZF88350.1)      | 100          | 98.21        | Phage_capsid                        |
| 6.      | 5374-5664         | 96/11.15                                              | 4.71 | Phage head-tail connector protein                    | <i>B. anthracis</i> phage Carmel_SA (ARW58550.1)  | 100          | 98.96        | Phage_connect_1                     |
| 7.      | 5661-5984         | 107/12.2                                              | 6.57 | Head-tail adaptor protein                            | <i>B. anthracis</i> phage Gamma (ABA46527.1)      | 100          | 98.13        | Phage_H_T_join                      |
| 8.      | 5977-6417         | 146/16.24                                             | 9.62 | Hypothetical protein (putative tail-component)       | <i>B. anthracis</i> phage Negev_SA (ARW58482.1)   | 100          | 100          | HK97-gp10_like                      |
| 9.      | 6414-6773         | 119/13.92                                             | 5.44 | Conserved phage protein (putative structure protein) | <i>B. anthracis</i> phage Gamma (YP_338192.1)     | 100          | 98.32        | DUF3168                             |
| 10.     | 6774-7382         | 202/22.96                                             | 5.17 | Major tail protein                                   | <i>B. anthracis</i> phage Negev_SA (ARW58475.1)   | 100          | 96.53        |                                     |
| 11.     | 7432-7749         | 105/11.64                                             | 4.46 | Hypothetical protein                                 | <i>B. anthracis</i> phage Carmel_SA (ARW58548.1)  | 100          | 100          |                                     |
| 12.     | 7761-7955         | 64/7.81                                               | 5.17 | Hypothetical protein                                 | <i>B. anthracis</i> phage Carmel_SA (ARW58515.1)  | 100          | 98.28        |                                     |
| 13.     | 7972-11823        | 1283/139.32                                           | 8.48 | Tail length tape-measure protein                     | <i>B. anthracis</i> phage Negev_SA (ARW58458.1)   | 100          | 97.43        | PhageMin_Tail, 3 TMDs               |

|     |                          |             |      |                                                                              |                                                     |     |       |               |
|-----|--------------------------|-------------|------|------------------------------------------------------------------------------|-----------------------------------------------------|-----|-------|---------------|
| 14. | 11838-13328              | 496/56.98   | 6.60 | Distal tail protein                                                          | <i>B. anthracis</i> phage Tavor_SA (ARW58399.1)     | 100 | 90.52 | Sipho_tail    |
| 15. | 13325-17254              | 1309/147.41 | 5.34 | Tal/RBP (Tail lysozyme/receptor-binding protein)                             | <i>B. anthracis</i> phage Carmel_SA (ARW58514.1)    | 100 | 79.87 | Peptidase_S74 |
| 16. | 17293-17529              | 78/8.67     | 6.44 | XpaF1 protein (hemolysin Xhla1 family protein)                               | uncultured <i>Caudoviricetes</i> phage (ASN69604.1) | 100 | 93.59 | XhlaA, TMD    |
| 17. | 17529-17768              | 79/8.38     | 9.16 | Holin                                                                        | <i>B. anthracis</i> phage Negev_SA (ARW58494.1)     | 100 | 93.67 | 2 TMDs        |
| 18. | 17765-18820              | 351/39.33   | 9.20 | N-acetylmuramoyl-L-alanine amidase                                           | <i>B. anthracis</i> phage Tavor_SA (ARW58406.1)     | 100 | 95.16 | Amidase_2, SP |
| 19. | Complement (18862-19188) | 108/12.29   | 9.70 | Hypothetical protein                                                         | <i>B. anthracis</i> phage Negev_SA (ARW58500.2)     | 100 | 92.59 | TMD           |
| 20. | Complement (19244-19438) | 64/7.26     | 9.36 | Repressor protein                                                            | <i>B. anthracis</i> phage Carmel_SA (ARW58551.1)    | 96  | 91.94 | HTH_3         |
| 21. | 19598-19900              | 104/12.73   | 4.81 | Hypothetical protein                                                         | <i>Bacillus</i> phage BVE2 (AUG88604.1)             | 100 | 94    |               |
| 22. | 19903-20085              | 60/6.74     | 9.70 | Hypothetical protein                                                         | <i>Bacillus</i> phage BVE2 (AUG88603.1)             | 100 | 90    | 2 TMDs        |
| 23. | 20095-21384              | 429/49.69   | 6.78 | FtsK/SpoIIIE family protein (cell division protein FtsK)                     | <i>B. anthracis</i> phage Wbeta (YP_459986.1)       | 100 | 95.34 | FtsK_SpoIIIE  |
| 24. | 21311-21943              | 210/25.18   | 9.84 | Conserved phage protein                                                      | <i>B. anthracis</i> phage Wbeta (YP_459987.1)       | 100 | 97.62 | Replic_Relax  |
| 25. | Complement (21977-22213) | 78/8.62     | 6.15 | HTH cro/C1-type domain-containing protein (putative transcription regulator) | <i>B. anthracis</i> phage Gamma (YP_338207.1)       | 100 | 100   | HTH_26        |
| 26. | 22377-22496              | 39/45.97    | 4.23 | Hypothetical protein                                                         | <i>B. anthracis</i> phage Gamma (YP_338208.1)       | 100 | 100   | DUF3961, TMD  |
| 27. | 22509-23372              | 287/33.38   | 8.85 | Conserved phage protein (HTH domain-containing protein)                      | <i>B. anthracis</i> phage Gamma (YP_338209.1)       | 100 | 97.56 | HTH_36        |
| 28. | 23470-24924              | 484/57.57   | 8.96 | Site-specific recombinase                                                    | <i>B. anthracis</i> phage Tavor_SA (ARW58402.1)     | 88  | 96.05 | Recombinase   |
| 29. | 25083-26369              | 428/49.89   | 6.15 | Hypothetical protein                                                         | <i>B. anthracis</i> phage Tavor_SA (ARW58400.1)     | 100 | 98.60 |               |

|     |                          |           |       |                                                                                                     |                                                                      |     |       |            |
|-----|--------------------------|-----------|-------|-----------------------------------------------------------------------------------------------------|----------------------------------------------------------------------|-----|-------|------------|
| 30. | 26272-26412              | 46/52.03  | 8.25  | AimP                                                                                                | <i>B. anthracis</i> phage Tavor_SA (-)                               | 100 | 97.83 | SP, TMD    |
| 31. | 26518-26673              | 51/61.08  | 4.93  | Hypothetical protein                                                                                | <i>B. anthracis</i> phage Tavor_SA (ARW58446.1)                      | 100 | 94.12 |            |
| 32. | Complement (26702-27061) | 119/13.75 | 6.17  | Hypothetical protein (HTH cro/C1 family protein)                                                    | <i>B. anthracis</i> phage Tavor_SA (ARW58421.1)                      | 100 | 99.16 | HTH_3      |
| 33. | 27223-27450              | 75/8.75   | 8.53  | Hypothetical protein (HTH cro/C1 family protein)                                                    | <i>B. anthracis</i> phage Tavor_SA (ARW58442.1)                      | 100 | 100   | HTH_3      |
| 34. | 27535-27702              | 55/6.59   | 9.15  | Hypothetical protein                                                                                | <i>B. anthracis</i> phage Tavor_SA (ARW58453.1)                      | 98  | 96.30 |            |
| 35. | 27776-27931              | 51/5.99   | 10.45 | Hypothetical protein                                                                                | <i>B. anthracis</i> phage Fah (YP_512340.1)                          | 100 | 94.12 |            |
| 36. | 27949-28695              | 248/29.14 | 5.51  | Putative antirepressor                                                                              | <i>B. anthracis</i> phage Carmel_SA (ARW58528.1)                     | 100 | 97.98 | ORF6C      |
| 37. | 28762-29415              | 217/25.81 | 6.22  | Hypothetical protein                                                                                | <i>B. anthracis</i> phage Tavor_SA (ARW58412.1)                      | 100 | 83.87 |            |
| 38. | 29544-30464              | 306/36.04 | 8.55  | Replication initiation protein                                                                      | <i>B. anthracis</i> phage Negev_SA (ARW58468.1)                      | 100 | 93.57 | Phg_2220_C |
| 39. | 30480-31391              | 303/34.94 | 8.70  | Putative DNA replication protein DnaC                                                               | <i>B. anthracis</i> phage Gamma (YP_338216.1)                        | 100 | 97.69 |            |
| 40. | 31410-31643              | 77/9.17   | 7.93  | Hypothetical protein                                                                                | <i>B. anthracis</i> phage Gamma (ABA46469.1)                         | 100 | 93.51 |            |
| 41. | 31636-32382              | 248/28.27 | 6.16  | Sigma-70 family RNA polymerase sigma factor (RNA polymerase sporulation specific sigma factor SigF) | <i>B. anthracis</i> phage Negev_SA (ARW58471.1)                      | 100 | 97.58 | Sigma70_r2 |
| 42. | 32379-32855              | 158/18.97 | 9.24  | Hypothetical protein                                                                                | <i>B. anthracis</i> phage Tavor_SA (ARW58419.1)                      | 100 | 95.57 |            |
| 43. | 32913-33455              | 180/21.16 | 5.89  | Dimeric dUTPase                                                                                     | <i>B. anthracis</i> phage Carmel_SA (ARW58535.1)                     | 100 | 95.56 | dUTPase_2  |
| 44. | 33496-33675              | 59/6.82   | 8.03  | Hypothetical protein                                                                                | <i>B. cereus</i> AFS001538 (PET50494.1) (Wbeta-like prophage region) | 100 | 98.31 |            |

|     |             |           |       |                                          |                                                                                |     |       |            |
|-----|-------------|-----------|-------|------------------------------------------|--------------------------------------------------------------------------------|-----|-------|------------|
| 45. | 33847-34017 | 56/6.05   | 4.50  | Hypothetical protein                     | <i>B. cereus</i> FSL W8-0268<br>(KXY22003.1)<br>(Wbeta-like prophage region)   | 100 | 98.21 |            |
| 46. | 34047-34649 | 200/23.67 | 6.04  | Hypothetical protein                     | <i>B. thuringiensis</i> GBAC46<br>(PRT13233.1)<br>(Wbeta-like prophage region) | 100 | 97    |            |
| 47. | 34844-35077 | 77/9.14   | 5.25  | Hypothetical protein                     | <i>B. anthracis</i> phage Tavor_SA<br>(ARW58441.1)                             | 100 | 97.40 |            |
| 48. | 35098-35259 | 53/6.12   | 9.37  | Hypothetical protein                     | <i>Bacillus</i> virus IEBH<br>(YP_002154356.1)                                 | 100 | 100   |            |
| 49. | 35449-35565 | 38/43.31  | 3.96  | Hypothetical protein                     | <i>B. cereus</i> VD045<br>(EJR26235.1)                                         | 100 | 100   |            |
| 50. | 35601-36041 | 146/17.47 | 4.77  | Hypothetical protein                     | uncultured <i>Caudoviricetes</i><br>phage (ASN69632.1)                         | 48  | 98.59 |            |
| 51. | 36188-36439 | 83/10.11  | 5.42  | Hypothetical protein                     | uncultured <i>Caudoviricetes</i><br>phage clone 9AX_2<br>(ASN69632.1)          | 98  | 95.12 |            |
| 52. | 36570-36860 | 96/11.09  | 10.21 | Hypothetical protein                     | <i>B. thuringiensis</i> 4XX2<br>(MRA88504.1)<br>(Wbeta-like prophage region)   | 100 | 96.88 |            |
| 53. | 36847-37035 | 62/7.09   | 4.61  | Hypothetical protein                     | <i>B. anthracis</i> phage Gamma<br>(ABB97503.1)                                | 100 | 90.32 |            |
| 54. | 37188-37310 | 40/4.88   | 11.52 | Hypothetical protein                     | <i>B. anthracis</i> phage Tavor_SA<br>(ARW58455.1)                             | 100 | 100   | DUF3983    |
| 55. | 37483-37878 | 131/15.57 | 6.34  | Sigma70_r4 domain-<br>containing protein | <i>B. anthracis</i> phage Wbeta<br>(YP_460009.1)                               | 100 | 98.47 | Sigma70_r4 |
| 56. | 37998-38222 | 74/8.52   | 5.09  | Hypothetical protein                     | <i>B. anthracis</i> phage Gamma<br>(ABA46507.1)                                | 100 | 86.49 |            |
| 57. | 38229-38450 | 73/8.21   | 5.61  | Hypothetical protein                     | <i>B. anthracis</i> phage AP631<br>(AZF88397.1)                                | 100 | 97.26 |            |
| 58. | 38456-38785 | 109/13.4  | 9.41  | Hypothetical protein                     | <i>B. anthracis</i> phage Carmel_SA<br>(ARW58546.1)                            | 100 | 92.66 |            |
| 59. | 38786-38977 | 63/7.14   | 4.44  | Hypothetical protein                     | <i>B. anthracis</i> phage Tavor_SA<br>(ARW58447.1)                             | 100 | 100   |            |
| 60. | 38997-39251 | 84/10.18  | 9.08  | Hypothetical protein                     | <i>B. anthracis</i> phage Tavor_SA<br>(ARW58435.1)                             | 100 | 97.62 |            |

|     |             |           |      |                      |                                               |     |       |     |
|-----|-------------|-----------|------|----------------------|-----------------------------------------------|-----|-------|-----|
| 61. | 39272-39418 | 48/5.60   | 8.82 | Hypothetical protein | <i>B. anthracis</i> phage Gamma (YP_338234.1) | 100 | 100   |     |
| 62. | 39450-39863 | 137/15.33 | 5.55 | Hypothetical protein | <i>B. anthracis</i> phage AP631 (AZF88400.1)  | 89  | 80.49 |     |
| 63. | 39932-40315 | 127/15.55 | 9.49 | HNH endonuclease     | <i>B. anthracis</i> phage Gamma (YP_338236.1) | 100 | 98.43 | HNH |

**Table S3.** Bacteriophage F16Ba genes and their predicted products. The coverage (in %) and identity (in %) of each protein with its closest homolog from the RefSeq database is as calculated with BLASTp. If no close viral homolog was found bacterial homologs were included. Signal peptides and transmembrane domains are indicated as SP and TMD, respectively.

| ORF No. | ORF position (bp) | Length of product (aa)/Predicted molecular mass (kDa) | pI   | Predicted function                                          | GenBank phage protein sequences with maximal identity | Coverage (%) | Identity (%) | Protein identifier (PHMMER results) |
|---------|-------------------|-------------------------------------------------------|------|-------------------------------------------------------------|-------------------------------------------------------|--------------|--------------|-------------------------------------|
| 1.      | 63-548            | 161/18.47                                             | 9.84 | Terminase small subunit                                     | <i>B. anthracis</i> phage Gamma (ABB55435.1)          | 100          | 97.52        | Terminase_4                         |
| 2.      | 545-2242          | 565/65.17                                             | 5.10 | Terminase large subunit                                     | <i>B. anthracis</i> phage Carmel_SA (ARW58516.1)      | 100          | 99.82        | Terminase_1                         |
| 3.      | 2258-3556         | 432/48.82                                             | 6.21 | Portal protein                                              | <i>B. anthracis</i> phage Fah (YP_512313.1)           | 99           | 97.90        | Phage_portal                        |
| 4.      | 3519-4139         | 206/23.72                                             | 5.11 | Prohead protease                                            | <i>B. anthracis</i> phage Gamma (YP_338187.1)         | 100          | 99.51        | Peptidase_S78                       |
| 5.      | 4178-5356         | 392/44.25                                             | 5.03 | Major capsid protein                                        | <i>B. anthracis</i> phage Gamma (ABB55431.2)          | 100          | 99.23        | Phage_capsid                        |
| 6.      | 5374-5664         | 96/11.17                                              | 4.71 | Phage head-tail connector protein                           | <i>B. anthracis</i> phage Carmel_SA (ARW58550.1)      | 100          | 96.88        | Phage_connect_1                     |
| 7.      | 5661-5984         | 107/12.19                                             | 5.80 | Head-tail adaptor protein (phage head-tail joining protein) | <i>B. anthracis</i> phage Gamma (ABA46527.1)          | 100          | 99.07        | Phage_H_T_join                      |
| 8.      | 5977-6417         | 146/16.24                                             | 9.62 | Hypothetical protein (putative tail component)              | <i>B. anthracis</i> phage Negev_SA (ARW58482.1)       | 100          | 100          | HK97-gp10_like                      |
| 9.      | 6414-6773         | 119/13.95                                             | 5.21 | Conserved phage protein (putative structure protein)        | <i>B. anthracis</i> phage Gamma (YP_338192.1)         | 100          | 98.32        | DUF3168                             |

|     |                          |              |      |                                                          |                                                     |     |       |                       |
|-----|--------------------------|--------------|------|----------------------------------------------------------|-----------------------------------------------------|-----|-------|-----------------------|
| 10. | 6774-7382                | 202/22.88    | 5.16 | Major tail protein                                       | <i>B. anthracis</i> phage Tavor_SA (ARW58414.1)     | 100 | 99.50 |                       |
| 11. | 7433-7750                | 105/11.68    | 4.35 | Hypothetical protein                                     | <i>B. anthracis</i> phage AP631 (AZF88356.1)        | 100 | 100   |                       |
| 12. | 7780-7956                | 58/7.02      | 5.13 | Hypothetical protein                                     | <i>B. anthracis</i> phage Gamma (YP_338195.1)       | 100 | 100   |                       |
| 13. | 7973-11824               | 1283/ 139.25 | 8.35 | Tail length tape-measure protein                         | <i>B. anthracis</i> phage Negev_SA (ARW58458.1)     | 100 | 99.06 | PhageMin_Tail, 3 TMDs |
| 14. | 11839-13329              | 496/56.91    | 7.04 | Distal tail protein                                      | <i>B. anthracis</i> phage Tavor_SA (ARW58399.1)     | 100 | 97.98 | Sipho_tail            |
| 15. | 13326-17393              | 1355/151.99  | 5.34 | Tal/RBP (Tail lysozyme/receptor-binding protein)         | <i>B. anthracis</i> phage Carmel_SA (ARW58514.1)    | 100 | 90.29 | Peptidase_S74         |
| 16. | 17432-17668              | 78/8.70      | 6.21 | XpaF1 protein                                            | uncultured <i>Caudoviricetes</i> phage (ASN69604.1) | 100 | 92.31 | XhlA, TMD             |
| 17. | 17668-17907              | 79/8.37      | 9.16 | Holin                                                    | <i>B. anthracis</i> phage Negev_SA (ARW58494.1)     | 100 | 94.94 | 2 TMDs                |
| 18. | 17904-18959              | 351/39.41    | 9.32 | N-acetylmuramoyl-L-alanine amidase                       | <i>B. anthracis</i> phage Tavor_SA (ARW58406.1)     | 100 | 98.29 | Amidase_2, SP         |
| 19. | Complement (18998-19327) | 109/12.36    | 9.70 | Hypothetical protein                                     | <i>B. anthracis</i> phage Negev_SA (ARW58500.2)     | 100 | 98.17 | TMD                   |
| 20. | Complement (19395-19988) | 197/22.98    | 5.26 | Hypothetical protein                                     | <i>B. anthracis</i> phage Negev_SA (ARW58476.1)     | 98  | 96.91 | T4SS-DNA_transf       |
| 21. | Complement (19985-20182) | 65/7.39      | 8.93 | Repressor protein                                        | <i>B. anthracis</i> phage Carmel_SA (ARW58551.1)    | 100 | 93.85 | HTH_3                 |
| 22. | 20342-20650              | 102/12.50    | 5.20 | Hypothetical protein                                     | <i>Bacillus</i> phage BVE2 (AUG88604.1)             | 98  | 89    |                       |
| 23. | 20647-20829              | 60/6.69      | 9.70 | Conserved phage protein                                  | <i>B. anthracis</i> phage Gamma (ABB72450.1)        | 100 | 96.67 | 2 TMDs                |
| 24. | 20839-22128              | 429/49.63    | 6.54 | FtsK/SpoIIIE family protein (cell division protein FtsK) | <i>B. anthracis</i> phage Wbeta (YP_459986.1)       | 100 | 95.57 | FtsK_SpoIIIE          |
| 25. | 22055-22687              | 210/25.20    | 9.84 | Conserved phage protein                                  | <i>B. anthracis</i> phage Wbeta (YP_459987.1)       | 100 | 98.10 | Replic_Relax          |



|     |                             |           |       |                                                                                                     |                                                     |     |       |                                                 |
|-----|-----------------------------|-----------|-------|-----------------------------------------------------------------------------------------------------|-----------------------------------------------------|-----|-------|-------------------------------------------------|
| 26. | Complement<br>(22721-22957) | 78/8.62   | 6.15  | HTH cro/C1-type domain-<br>containing protein (putative<br>XRE family transcriptional<br>regulator) | <i>B. anthracis</i> phage Gamma<br>(YP_338207.1)    | 100 | 100   | HTH_26                                          |
| 27. | 23122-23241                 | 39/45.97  | 4.23  | Hypothetical protein                                                                                | <i>B. anthracis</i> phage Gamma<br>(YP_338208.1)    | 100 | 100   | DUF3961, TMD                                    |
| 28. | 23254-24117                 | 287/33.37 | 8.98  | Conserved phage protein<br>(HTH domain-containing<br>protein)                                       | <i>B. anthracis</i> phage Gamma<br>(YP_338209.1)    | 100 | 99.65 | HTH_36                                          |
| 29. | 24193-25638                 | 481/56.42 | 9.16  | Site-specific recombinase                                                                           | <i>B. anthracis</i> phage AP631<br>(AZF88373.1)     | 100 | 99.17 | Resolvase                                       |
| 30. | 25741-27075                 | 444/51.24 | 7.45  | Hypothetical protein                                                                                | <i>B. anthracis</i> phage Negev_SA<br>(ARW58462.1)  | 100 | 98.87 |                                                 |
| 31. | 26984-27133                 | 49/54.14  | 9.73  | AimP                                                                                                | <i>B. anthracis</i> phage Wbeta<br>(-)              | 100 | 100   | Kinase domain<br>protein (fragment),<br>SP, TMD |
| 32. | 27272-27394                 | 40/47.03  | 8.77  | Hypothetical protein                                                                                | <i>B. anthracis</i> phage AP631<br>(AZF88375.1)     | 100 | 87.50 |                                                 |
| 33. | Complement<br>(27416-27772) | 118/13.62 | 6.30  | Hypothetical protein (HTH<br>Cro/C1 family protein)                                                 | <i>B. anthracis</i> phage Wbeta<br>(YP_459993.1)    | 100 | 99.15 | HTH_31                                          |
| 34. | 27932-28159                 | 75/8.80   | 8.52  | Hypothetical protein (HTH<br>Cro/C1 family protein)                                                 | <i>B. anthracis</i> phage Wbeta<br>(YP_459994.1)    | 100 | 100   | HTH_3                                           |
| 35. | 28199-28357                 | 52/6.06   | 6.23  | Conserved phage protein                                                                             | <i>B. anthracis</i> phage Wbeta<br>(YP_459995.1)    | 100 | 100   |                                                 |
| 36. | 28429-28584                 | 51/6.04   | 10.28 | Hypothetical protein                                                                                | <i>B. anthracis</i> phage Fah<br>(YP_512340.1)      | 100 | 98.04 |                                                 |
| 37. | 28602-29348                 | 248/29.17 | 5.83  | Putative antirepressor                                                                              | <i>B. anthracis</i> phage Carmel_SA<br>(ARW58528.1) | 100 | 96.77 | ORF6C                                           |
| 38. | 29376-29753                 | 125/14.80 | 5.10  | Hypothetical protein                                                                                | <i>B. anthracis</i> phage Carmel_SA<br>(ARW58544.1) | 100 | 95.20 |                                                 |
| 39. | 29760-30410                 | 216/25.47 | 7.65  | Hypothetical protein                                                                                | <i>B. anthracis</i> phage Carmel_SA<br>(ARW58530.1) | 100 | 92.59 |                                                 |
| 40. | 30539-31480                 | 313/36.85 | 7.74  | Replication initiation<br>protein                                                                   | <i>B. anthracis</i> phage Negev_SA<br>(ARW58468.1)  | 100 | 96.17 | Phg_2220_C                                      |

|     |                             |           |       |                                                         |                                                                             |     |       |                 |
|-----|-----------------------------|-----------|-------|---------------------------------------------------------|-----------------------------------------------------------------------------|-----|-------|-----------------|
| 41. | 31496-32407                 | 303/34.92 | 8.81  | Putative DnaC protein<br>(putative replication protein) | <i>B. anthracis</i> phage Wbeta<br>(ABC40434.1)                             | 100 | 98.68 |                 |
| 42. | 32426-32659                 | 77/9.14   | 7.93  | Hypothetical protein                                    | <i>B. anthracis</i> phage Wbeta<br>(ABC40435.1)                             | 100 | 98.33 |                 |
| 43. | 32652-33398                 | 248/28.20 | 5.72  | RNA polymerase<br>sporulation specific sigma<br>factor  | <i>B. anthracis</i> phage Tavor_SA<br>(ARW58411.1)                          | 100 | 100   | Sigma70_r2      |
| 44. | 33395-33871                 | 158/18.97 | 9.13  | Hypothetical protein                                    | <i>B. anthracis</i> phage Tavor_SA<br>(ARW58419.1)                          | 100 | 99.37 |                 |
| 45. | 33929-34471                 | 180/21.17 | 5.26  | Dimeric dUTPase                                         | <i>B. anthracis</i> phage Carmel_SA<br>(ARW58535.1)                         | 100 | 97.22 | dUTPase_2       |
| 46. | Complement<br>(34598-35383) | 261/31.33 | 6.79  | Beta-galactosidase                                      | <i>B. anthracis</i> phage Carmel_SA<br>(ARW58527.1)                         | 100 | 92.72 | Sulfotransfer_2 |
| 47. | 35686-35874                 | 62/7.22   | 4.54  | Hypothetical protein                                    | <i>B. anthracis</i> phage Carmel_SA<br>(ARW58563.1)                         | 100 | 88.71 |                 |
| 48. | 36027-36149                 | 40/4.81   | 10.77 | Conserved phage protein                                 | <i>B. anthracis</i> phage Gamma<br>(ABA46517.1)                             | 100 | 92.50 | DUF3983         |
| 49. | 36322-36717                 | 131/15.60 | 5.99  | Sigma70_r4 domain-<br>containing protein                | <i>B. anthracis</i> phage Wbeta<br>(YP_460009.1)                            | 100 | 97.71 | Sigma70_r4      |
| 50. | 36902-37321                 | 139/16.25 | 4.78  | Hypothetical protein                                    | <i>B. thuringiensis</i> KB1<br>(KXO02459.1)<br>(Wbeta-like prophage region) | 100 | 94.96 | DUF3775         |
| 51. | 37382-37606                 | 74/8.54   | 6.58  | Hypothetical protein                                    | <i>B. anthracis</i> phage Carmel_SA<br>(ARW58558.1)                         | 100 | 94.59 |                 |
| 52. | 37613-37834                 | 73/8.18   | 5.86  | Hypothetical protein                                    | <i>B. anthracis</i> phage Tavor_SA<br>(ARW58445.1)                          | 100 | 98.63 |                 |
| 53. | 37841-38095                 | 84/10.24  | 8.97  | Hypothetical protein                                    | <i>B. anthracis</i> phage Tavor_SA<br>(ARW58435.1)                          | 100 | 89.29 |                 |
| 54. | 38133-38516                 | 127/15.48 | 9.46  | HNH endonuclease                                        | <i>B. anthracis</i> phage Fah<br>(YP_512360.1)                              | 100 | 97.64 | HNH             |

**Table S4.** Bacteriophage z1a genes and their predicted products. The coverage (in %) and identity (in %) of each protein with its closest homolog from the RefSeq database is as calculated with BLASTp. If no close viral homolog was found bacterial homologs were included. Signal peptides and transmembrane domains are indicated as SP and TMD, respectively.

| ORF No. | ORF position (bp) | Length of product (aa)/Predicted molecular mass (kDa) | pI   | Predicted function                                | GenBank phage protein sequences with maximal identity | Coverage (%) | Identity (%) | Protein identifier (PHMMER results) |
|---------|-------------------|-------------------------------------------------------|------|---------------------------------------------------|-------------------------------------------------------|--------------|--------------|-------------------------------------|
| 1.      | 63-548            | 161/18.52                                             | 9.88 | Terminase small subunit                           | <i>B. anthracis</i> phage Carmel_SA (ARW58537.1)      | 100          | 99.38        | Terminase_4                         |
| 2.      | 545-2242          | 565/65.17                                             | 5.07 | Terminase large subunit                           | <i>B. anthracis</i> phage Carmel_SA (ARW58516.1)      | 100          | 100          | Terminase_1                         |
| 3.      | 2258-3556         | 432/48.78                                             | 7.08 | Portal protein                                    | <i>B. anthracis</i> phage Gamma (YP_338186.1)         | 100          | 97.69        | Phage_portal                        |
| 4.      | 3519-4139         | 206/23.7                                              | 5.11 | Prohead protease                                  | <i>B. anthracis</i> phage Negev_SA (ARW58474.1)       | 100          | 98.54        | Peptidase_S78                       |
| 5.      | 4178-5356         | 392/44.22                                             | 5.04 | Major capsid protein                              | <i>B. anthracis</i> phage Carmel_SA (ARW58522.1)      | 100          | 100          | Phage_capsid                        |
| 6.      | 5374-5664         | 96/11.15                                              | 4.71 | Phage head-tail connector protein                 | <i>B. anthracis</i> phage Carmel_SA (ARW58550.1)      | 100          | 100          | Phage_connect_1                     |
| 7.      | 5661-5984         | 107/12.28                                             | 7.87 | Head-tail adaptor protein                         | <i>B. anthracis</i> phage Carmel_SA (ARW58547.1)      | 100          | 97.20        | Phage_H_T_join                      |
| 8.      | 5977-6417         | 146/16.24                                             | 9.62 | Hypothetical protein (putative tail component)    | <i>B. anthracis</i> phage Negev_SA (ARW58482.1)       | 100          | 100          | HK97-gp10_like                      |
| 9.      | 6414-6773         | 119/13.94                                             | 5.21 | Hypothetical protein (putative structure protein) | <i>B. anthracis</i> phage Carmel_SA (ARW58545.1)      | 100          | 97.48        | DUF3168                             |
| 10.     | 6774-7382         | 202/22.88                                             | 5.27 | Major tail protein                                | <i>B. anthracis</i> phage Gamma (YP_338193.1)         | 100          | 97.52        |                                     |
| 11.     | 7431-7748         | 105/16.67                                             | 4.46 | Hypothetical protein                              | <i>B. anthracis</i> phage Carmel_SA (ARW58548.1)      | 100          | 99.05        |                                     |
| 12.     | 7760-7954         | 64/7.68                                               | 4.97 | Hypothetical protein                              | <i>B. anthracis</i> phage Gamma (YP_338195.1)         | 90           | 93.10        |                                     |
| 13.     | 7971-11822        | 1283/139.40                                           | 7.94 | Tail length tape-measure protein                  | <i>B. anthracis</i> phage AP631 (AZF88358.1)          | 100          | 91.58        | PhageMin_Tail, 3 TMDs               |

|     |                          |             |      |                                                          |                                                     |     |       |                 |
|-----|--------------------------|-------------|------|----------------------------------------------------------|-----------------------------------------------------|-----|-------|-----------------|
| 14. | 11837-13327              | 496/56.84   | 7.14 | Distal tail protein                                      | <i>B. anthracis</i> phage Carmel_SA (ARW58517.1)    | 100 | 98.39 | Sipho_tail      |
| 15. | 13324-17250              | 1308/147.40 | 5.36 | Tal/RBP (Tail lysozyme/receptor-binding protein)         | <i>B. anthracis</i> phage Carmel_SA (ARW58514.1)    | 100 | 83.76 |                 |
| 16. | 17289-17525              | 78/8.67     | 6.41 | XpaF1 protein                                            | uncultured <i>Caudoviricetes</i> phage (ASN69604.1) | 100 | 92.31 | XhlA, TMD       |
| 17. | 17525-17764              | 79/8.32     | 9.52 | Holin                                                    | <i>B. anthracis</i> phage Tavor_SA (ARW58439.1)     | 100 | 100   | 2 TMDs          |
| 18. | 17761-18816              | 351/39.23   | 9.20 | N-acetylmuramoyl-L-alanine amidase                       | <i>B. anthracis</i> phage Tavor_SA (ARW58406.1)     | 100 | 96.58 | Amidase_2, SP   |
| 19. | Complement (18855-19184) | 109/12.39   | 9.70 | Hypothetical protein                                     | <i>B. anthracis</i> phage Carmel_SA (ARW58540.1)    | 100 | 99.08 | TMD             |
| 20. | Complement (19252-19836) | 194/22.74   | 5.28 | Hypothetical protein                                     | <i>B. anthracis</i> phage Carmel_SA (ARW58533.1)    | 100 | 97.94 | T4SS-DNA_transf |
| 21. | Complement (19842-20039) | 65/7.40     | 7.87 | Repressor protein                                        | <i>B. anthracis</i> phage Carmel_SA (ARW58551.1)    | 100 | 98.46 | HTH_3           |
| 22. | 20199-20507              | 102/12.48   | 5.06 | Hypothetical protein                                     | <i>B. anthracis</i> phage Carmel_SA (ARW58549.1)    | 100 | 98.04 |                 |
| 23. | 20504-20686              | 60/6.70     | 9.70 | Conserved phage protein                                  | <i>B. anthracis</i> phage Gamma (YP_338204.1)       | 100 | 96.67 | 2 TMDs          |
| 24. | 20696-21985              | 429/49.43   | 8.80 | Cell division protein FtsK                               | <i>B. anthracis</i> phage Carmel_SA (ARW58520.1)    | 100 | 98.83 | FtsK_SpoIIIE    |
| 25. | 21912-22544              | 210/25.25   | 9.84 | Conserved phage protein                                  | <i>B. anthracis</i> phage Wbeta (YP_459987.1)       | 100 | 98.57 | Replic_Relax    |
| 26. | Complement (22577-22813) | 78/8.65     | 5.23 | Hypothetical protein (putative phage regulatory protein) | <i>B. anthracis</i> phage Carmel_SA (ARW58556.1)    | 100 | 100   | HTH_26          |
| 27. | 22977-23096              | 39/4.63     | 4.56 | Hypothetical protein                                     | <i>B. anthracis</i> phage AP631 (AZF88371.1)        | 100 | 84.62 | DUF3961, TMD    |
| 28. | 23112-23975              | 287/33.50   | 8.70 | Hypothetical protein (HTH domain-containing protein)     | <i>B. anthracis</i> phage Tavor_SA (ARW58408.1)     | 100 | 94.08 | HTH_36          |
| 29. | 24073-25527              | 484/57.53   | 8.90 | Site-specific recombinase                                | <i>B. anthracis</i> phage Tavor_SA (ARW58402.1)     | 88  | 97.91 | Recombinase     |

|     |                          |           |       |                                                    |                                                  |     |       |            |
|-----|--------------------------|-----------|-------|----------------------------------------------------|--------------------------------------------------|-----|-------|------------|
| 30. | 25686-26972              | 428/50.01 | 6.33  | Hypothetical protein                               | <i>B. anthracis</i> phage Tavor_SA (ARW58400.1)  | 100 | 98.36 |            |
| 31. | 26875-27015              | 46/50.99  | 8.25  | AimP                                               | <i>B. anthracis</i> phage Tavor_SA (-)           | 100 | 91.30 | SP, TMD    |
| 32. | 27077-27280              | 67/8.10   | 6.26  | Hypothetical protein                               | <i>B. anthracis</i> phage Tavor_SA (ARW58446.1)  | 100 | 94.03 |            |
| 33. | Complement (27308-27667) | 119/13.70 | 6.21  | Hypothetical protein (HTH Cro/C1 family protein)   | <i>B. anthracis</i> phage Tavor_SA (ARW58421.1)  | 100 | 100   | HTH_3      |
| 34. | 27829-28056              | 75/8.74   | 8.55  | Hypothetical protein (HTH Cro/C1 family protein)   | <i>B. anthracis</i> phage Tavor_SA (ARW58442.1)  | 100 | 96    | HTH_3      |
| 35. | 28143-28307              | 54/6.46   | 9.15  | Hypothetical protein                               | <i>B. anthracis</i> phage Tavor_SA (ARW58453.1)  | 100 | 98.15 |            |
| 36. | 28381-28536              | 51/5.99   | 10.35 | Hypothetical protein                               | <i>B. anthracis</i> phage Fah (YP_512340.1)      | 100 | 90.20 |            |
| 37. | 28554-29300              | 248/29.21 | 5.52  | Putative antirepressor                             | <i>B. anthracis</i> phage Carmel_SA (ARW58528.1) | 100 | 97.98 | ORF6C      |
| 38. | 29328-29705              | 125/14.94 | 4.77  | Hypothetical protein                               | <i>B. anthracis</i> phage Carmel_SA (ARW58544.1) | 100 | 99.20 |            |
| 39. | 29712-30362              | 216/25.60 | 7.65  | Hypothetical protein                               | <i>B. anthracis</i> phage Carmel_SA (ARW58530.1) | 100 | 95.83 |            |
| 40. | 30491-31459              | 322/38.04 | 6.31  | Putative phage replisome organizer protein         | <i>B. anthracis</i> phage Gamma (ABA46496.1)     | 100 | 90.37 | Phg_2220_C |
| 41. | 31475-32386              | 303/34.81 | 8.91  | DNA replication protein DnaC (ATP-binding protein) | <i>B. anthracis</i> phage Gamma (YP_338216.1)    | 100 | 95.71 |            |
| 42. | 32405-32638              | 77/9.22   | 5.84  | Hypothetical protein                               | <i>B. anthracis</i> phage AP631 (AZF88385.1)     | 100 | 89.61 |            |
| 43. | 32631-33377              | 248/28.26 | 5.90  | RNA polymerase sporulation specific sigma          | <i>B. anthracis</i> phage Gamma (YP_338218.1)    | 100 | 94.76 | Sigma70_r2 |
| 44. | 33374-33850              | 158/18.86 | 9.14  | Hypothetical protein                               | <i>B. anthracis</i> phage Carmel_SA (ARW58538.1) | 100 | 96.20 |            |
| 45. | 33909-34451              | 180/21.18 | 5.37  | Dimeric dUTPase                                    | <i>B. anthracis</i> phage Carmel_SA (ARW58535.1) | 100 | 96.67 | dUTPase_2  |

|     |             |           |       |                                      |                                                    |     |       |            |
|-----|-------------|-----------|-------|--------------------------------------|----------------------------------------------------|-----|-------|------------|
| 46. | 34489-34887 | 132/14.65 | 7.66  | Hypothetical protein                 | <i>Bacillus</i> phage vB_BthS-HD29phi (QDP43463.1) | 100 | 98.48 | SP         |
| 47. | 35281-35469 | 62/7.18   | 4.78  | Hypothetical protein                 | <i>B. anthracis</i> phage Gamma (YP_338227.1)      | 100 | 85.48 |            |
| 48. | 35622-35744 | 40/4.91   | 11.52 | Hypothetical protein                 | <i>B. anthracis</i> phage Tavor_SA (ARW58455.1)    | 100 | 97.50 | DUF3983    |
| 49. | 35918-36313 | 131/15.56 | 6.01  | Sigma70_r4 domain-containing protein | <i>B. anthracis</i> phage Wbeta (YP_460009.1)      | 100 | 98.47 | Sigma70_r4 |
| 50. | 36469-36981 | 170/19.66 | 5.49  | Hypothetical protein                 | <i>B. anthracis</i> phage Carmel_SA (ARW58536.1)   | 100 | 98.82 |            |
| 51. | 37044-37268 | 74/8.52   | 7.93  | Hypothetical protein                 | <i>B. anthracis</i> phage Carmel_SA (ARW58558.1)   | 100 | 100   |            |
| 52. | 37275-37496 | 73/8.18   | 5.87  | Conserved phage protein              | <i>B. anthracis</i> phage Gamma (YP_338231.1)      | 100 | 95.89 |            |
| 53. | 37502-37831 | 109/13.45 | 9.41  | Hypothetical protein                 | <i>B. anthracis</i> phage Carmel_SA (ARW58546.1)   | 98  | 95.33 |            |
| 54. | 37832-38023 | 63/7.14   | 4.44  | Hypothetical protein                 | <i>B. anthracis</i> phage Tavor_SA (ARW58447.1)    | 100 | 100   |            |
| 55. | 38043-38297 | 84/10.13  | 8.96  | Hypothetical protein                 | <i>B. anthracis</i> phage Tavor_SA (ARW58435.1)    | 100 | 98.81 |            |
| 56. | 38294-38464 | 56/6.49   | 9.27  | Hypothetical protein                 | <i>B. anthracis</i> phage AP631 (AZF88399.1)       | 100 | 89.29 |            |
| 57. | 38496-38909 | 137/15.47 | 5.56  | Hypothetical protein                 | <i>B. anthracis</i> phage AP631 (AZF88400.1)       | 91  | 79.20 |            |
| 58. | 38978-39361 | 127/15.60 | 9.53  | HNH endonuclease                     | <i>B. anthracis</i> phage Fah (YP_512360.1)        | 100 | 96.06 | HNH        |

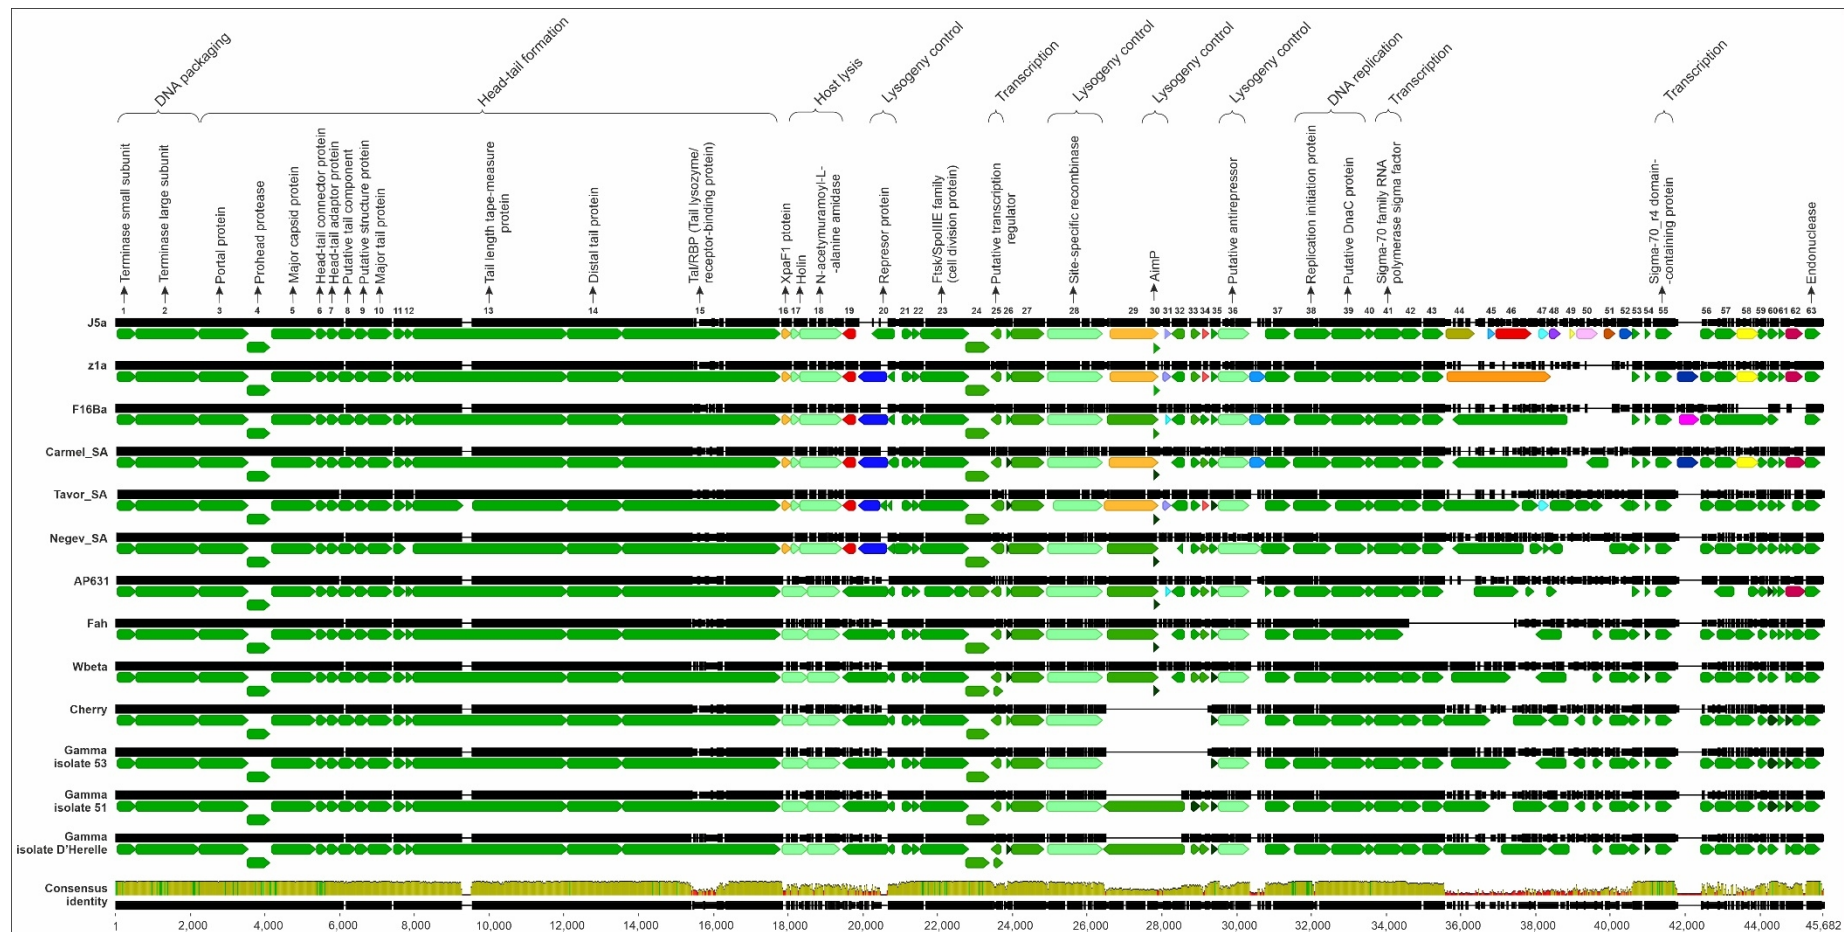

**Figure S2.** Gene synteny in the genomes of phages J5a, F16Ba, z1a and known or proposed members of *Wbetavirus* genus. The alignment (gapped) was performed with the use of Geneious Prime. Predicted protein-coding genes (CDSs) are color-coded based on the amino acid sequence identity of their products (considered as 70% or higher) or functions. CDSs encoding proteins of J5a, F16Ba and z1a bacteriophages with no homologs among proteins of other *wbetaviruses* are indicated by unique colors. If two to six phages shared a similar sequence of a protein, the adequate CDSs were given a common color. If more than six phages had a similar sequence of a specific protein, the CDSs were left green. Light green indicates CDSs of similar function but no significant sequence similarity in all genomes. Empty regions in the reference phage genomes were screened revealing the presence of previously unidentified open reading frames. The newly identified genes were re-annotated and were marked with a dark green color. The re-annotated genes are listed in a Table S5 (see also Table S8). Their other genes were also additionally verified what revealed a need to alter some coordinates (these ORFs are marked with an asterisk in a Table S8). The scale length corresponds to the consensus sequence including gaps.

**Table S5.** Coordinates of the newly identified or re-annotated CDSs in the genomes of reference phages.

| <b>Carmel_SA<br/>(KY963371.1)</b> | <b>Tavor_SA<br/>(KY963369.1)</b> | <b>Negev_SA<br/>(KY963370.1)</b> | <b>AP631<br/>(MK085976.1)</b> | <b>Fah<br/>(DQ150593.1)</b> | <b>Wbeta<br/>(DQ289555.1)</b> | <b>Cherry<br/>(DQ222851.1)</b> | <b>Gamma<br/>isolate 53<br/>(DQ222855.1)</b> | <b>Gamma<br/>isolate 51<br/>(DQ222853.1)</b> | <b>Gamma isolate<br/>D'Herelle<br/>(DQ289556.1)</b> |
|-----------------------------------|----------------------------------|----------------------------------|-------------------------------|-----------------------------|-------------------------------|--------------------------------|----------------------------------------------|----------------------------------------------|-----------------------------------------------------|
| 23,000-23,119                     | 23,449-23,568                    | 22,999-23,115                    | 26,041-26,163                 | 7,770- 7,946                | 22,202-22,321                 | 24,711- 24,866                 | 24,710- 24,865                               | 24,852-25,079                                | 22,174-22,293                                       |
| 26,898-27,038                     | 28,849-29,004                    | 26,860-27,009                    |                               | 22,037- 22,156              | 27,510-27,665                 | 35,273- 35,527                 | 36,734- 36,988                               | 25,349-25,504                                | 25,478- 25,633                                      |
|                                   | 27,347-27,487                    |                                  |                               | 34,644- 34,766              | 37,546-37,668                 | 35,726- 35,917                 | 37,187- 37,378                               | 35,911-36,165                                | 34,052- 34,174                                      |
|                                   |                                  |                                  |                               | 25,899-26,048               | 26,064-26,213                 |                                |                                              | 36,364-36,555                                |                                                     |



**Table S6.** Results of HHpred analysis of selected J5a phage proteins. The best and most relevant hits are shown, including the coordinates of the matching regions, PDB ID and chain identifier, and the HHpred probability (%) in the matched regions. Only proteins HHpred probability results over 80% are presented. Proteins of J5a phage of no homologs among proteins of F16Ba and z1a phages are marked with an asterisk. Corresponding proteins were assessed as those sharing more than 70% sequence identity, according to BLASTp.

| ORF     | Protein<br>length<br>(aa) | Matched<br>residues<br>(aa) | HHpred best match                                                                                                                                                                                                      | PDB ID  | Probability(%) |
|---------|---------------------------|-----------------------------|------------------------------------------------------------------------------------------------------------------------------------------------------------------------------------------------------------------------|---------|----------------|
| J5a_014 | 496                       | 190-437                     | Tail component; bacteriophage infection, <i>Lactobacillus casei</i> , fluorescence microscopy, Carbohydrate Binding Module, sugar binding protein; 1.28A { <i>Lactobacillus</i> phage J-1}                             | 5LY8_A  | 99.98          |
|         |                           | 2-196                       | HYPOTHETICAL PROTEIN 19.1; VIRAL PROTEIN, DISTAL TAIL PROTEIN; 2.95A {BACILLUS PHAGE SPP1}                                                                                                                             | 2X8K_C  | 99.85          |
|         |                           | 1-197                       | Distal tail protein, Receptor-binding protein, Phage baseplate, host adsorption apparatus, genome injection device, VIRAL PROTEIN; 3.8A { <i>Lactococcus</i> phage TP901-1}                                            | 4V96_AX | 99.77          |
|         |                           | 1-200                       | Distal Tail Protein, gp58; phage tail, tail tip, tape measure protein, VIRAL PROTEIN; 3.7A { <i>Staphylococcus</i> virus 80alpha}                                                                                      | 6V8I_BD | 99.65          |
|         |                           | 1-200                       | LACTOCOCCAL PHAGE P2 ORF15; BASEPLATE, VIRAL PROTEIN; 2.6A { <i>Lactococcus</i> Phage P2}                                                                                                                              | 2WZP_Q  | 98.21          |
| J5a_015 | 1309                      | 6-378                       | Tail-Associated Lysin, gp59; phage tail, tail tip, tape measure protein, VIRAL PROTEIN; 3.7A { <i>Staphylococcus</i> virus 80alpha}                                                                                    | 6V8I_CE | 99.94          |
|         |                           | 3-356                       | Protein gp18; NP_465809.1, prophage tail protein gp18, Structural Genomics, Joint Center for Structural Genomics, JCSG, Protein Structure Initiative; HET: MSE, MLY; 1.7A { <i>Listeria monocytogenes</i> EGD-e}       | 3GS9_A  | 99.90          |
|         |                           | 29-355                      | Tail protein, 43 kDa; tail protein, structural genomics, PSI, MCSG, Protein Structure Initiative, Midwest Center for Structural Genomics, UNKNOWN FUNCTION; 2.1A { <i>Neisseria meningitidis</i> MC58} SCOP: b.106.1.1 | 3D37_A  | 99.08          |
|         |                           | 1166-1289                   | Long tail fiber distal subunit; Bacteriophage, Helical sandwich, Tail fiber, polyglycine, VIRAL PROTEIN; HET: MRD, MPD, IMD; 1.70355818561A { <i>Salmonella</i> phage vB_SenMS16}                                      | 6F45_B  | 96.25          |
|         |                           | 1166-1297                   | Isoform 2 of Myelin regulatory factor; auto-catalytic protease, protein chaperone. trimeric protein, triple coiled-coil, membrane PROTEIN; HET: MSE; 2.4A { <i>Mus musculus</i> }                                      | 7DC3_A  | 95.93          |
|         |                           | 1166-1283                   | Endo-N-acetylneuraminidase; Chaperone, Glycosidase, Hydrolase; HET: TAM, PEG; 2.6A { <i>Enterobacteria</i> phage K1F}                                                                                                  | 3GW6_B  | 95.76          |
|         |                           | 1166-1279                   | L-SHAPED tail fiber protein; viral protein, bacterial viruses, caudovirales, siphoviridae, infection; HET: FLC; 2.52A {ENTEROBACTERIA PHAGE T5}                                                                        | 4UW8_H  | 95.19          |
|         |                           | 1100-1271                   | Tail spike protein; bacteriophage, tailspike, <i>Acinetobacter baumannii</i> , gp42, VIRAL PROTEIN; HET: MSE; 1.794A { <i>Acinetobacter</i> phage vB_AbaP_AS12}                                                        | 6EU4_B  | 87.82          |
|         |                           | 46-192                      | Bifunctional autolysin; peptidoglycan, autolysin, amidase, N-acetylmuramoyl-L-alanine amidase, HYDROLASE; HET: IMD, PEG;                                                                                               | 4KNK_A  | 99.76          |
|         |                           | 45-192                      | Autolysin; LytA, pneumococci, autolysis, amidase, peptidoglycan complex, antibiotics, hydrolase; HET: NAG, DGL, AMV; 1.05A { <i>Streptococcus pneumoniae</i> serotype 4}                                               | 5CTV_A  | 99.54          |
| J5a_018 | 351                       | 45-194                      | Endolysin; amidase-2 domain, HYDROLASE; HET: ZN; 2.27A { <i>Staphylococcus</i> phage GH15}                                                                                                                             | 4OLS_A  | 99.50          |
|         |                           | 2-186                       | N-acetylmuramoyl-L-alanine amidase; amidase, zinc binding, cell wall degradation, endolysine, hydrolase; HET: PO4, GOL; 1.21A { <i>Clostridium intestinale</i> }                                                       | 6SSC_A  | 99.41          |
|         |                           | 26-190                      | prophage LambdaBa02, N-acetylmuramoyl-L-alanine amidase, family 2; N-acetylmuramoyl-L-alanine amidase, PlyL, E.C.3.5.1.28, HYDROLASE; HET: PO4; 1.86A { <i>Bacillus anthracis</i> } SCOP: d.118.1.1                    | 1YB0_B  | 99.38          |
|         |                           | 199-349                     | L-alanyl-D-glutamate peptidase; listeria, endolysin, cell wall binding domain, bacteriophage, VIRAL PROTEIN; 1.59A { <i>Listeria</i> phage A500}                                                                       | 6HX0_A  | 98.51          |
|         |                           | 209-349                     | putative dipeptidyl-peptidase VI; Structural Genomics, Joint Center for Structural Genomics, JCSG, Protein Structure Initiative, PSI-2, HYDROLASE; HET: GOL, CSA, MSE; 1.72A { <i>Bacteroides ovatus</i> }             | 3NPF_A  | 97.65          |
|         |                           | 210-350                     | Clan CA, family C40, NlpC/P60 superfamily cysteine peptidase; peptidase, NlpC protein, HYDROLASE; 1.2A { <i>Trichomonas vaginalis</i> }                                                                                | 6BIO_A  | 97.61          |
|         |                           | 220-351                     | NLP/P60 family protein; NLPC/P60 FAMILY PROTEIN, STRUCTURAL GENOMICS, JOINT CENTER FOR STRUCTURAL                                                                                                                      | 3H41_A  | 97.35          |

|          |     |                                                                                                                                |                                                                                                                                                                   |              |
|----------|-----|--------------------------------------------------------------------------------------------------------------------------------|-------------------------------------------------------------------------------------------------------------------------------------------------------------------|--------------|
|          |     | GENOMICS, JCSG, PROTEIN STRUCTURE INITIATIVE, PSI-2, HYDROLASE; HET: PG4, MSE, DGL; 1.79A { <i>Bacillus cereus</i> ATCC 10987} |                                                                                                                                                                   |              |
| J5a_019  | 108 | 209-349                                                                                                                        | Ply protein; alpha/beta hydrolase, multi-domain, hydrolase; 1.8A { <i>Listeria</i> phage PSA} SCOP: c.56.5.6, l.1.1.1, b.34.11.4                                  | 1XOV_A 96.61 |
|          |     | 73-106                                                                                                                         | <i>Homo sapiens</i> Transcription initiation factor IIE, alpha subunit; zinc finger                                                                               | 1VD4_A 98.45 |
|          |     | 74-106                                                                                                                         | <i>Thermococcus kodakarensis</i> DNA-directed RNA polymerase subunit P                                                                                            | 4QIW_P 98.36 |
|          |     | 75-106                                                                                                                         | <i>Sulfolobus shibatae</i> DNA-directed RNA polymerase; transferase, multi-subunit                                                                                | 4AYB_P 98.23 |
| J5a_024  | 210 | 2-81                                                                                                                           | <i>Mycobacterium tuberculosis</i> (strain ATCC 25618/H37Rv) transcriptional regulator; DNA binding protein                                                        | 5ZHC_B 97.41 |
|          |     | 10-77                                                                                                                          | <i>Bacteroides thetaiotaomicron</i> uncharacterized protein                                                                                                       | 2L02_A 97.36 |
|          |     | 13-80                                                                                                                          | <i>Enterobacteria</i> phage T4 transcription regulatory protein MOTA                                                                                              | 1BJA_B 97.33 |
|          |     | 128-184                                                                                                                        | Severe fever with thrombocytopenia virus RNA polymerase                                                                                                           | 6NTV_A 90.09 |
|          |     | 128-184                                                                                                                        | Toscana virus RNA-dependent RNA polymerase                                                                                                                        | 6QW0_B 89.29 |
| J5a_027  | 287 | 35-116                                                                                                                         | <i>Bacillus subtilis</i> DNA replication protein DnaD; primosome, DNA-binding protein                                                                             | 2V79_A 98.49 |
|          |     | 35-96                                                                                                                          | <i>Sulfolobus tokodaii</i> 109aa long hypothetical transcriptional regulator; helix-turn-helix                                                                    | 2D1H_B 98.22 |
|          |     | 35-96                                                                                                                          | <i>Geobacillus kaustophilus</i> HTA426 chromosome replication initiation protein; DnaD                                                                            | 2VN2_C 98.21 |
| J5a_029  | 428 | 12-384                                                                                                                         | <i>Bacillus</i> phage phi3T AimR transcriptional regulator                                                                                                        | 5ZVV_B 99.97 |
|          |     | 9-386                                                                                                                          | <i>Bacillus</i> phage SPbeta AimR transcriptional regulator; DNA binding protein, peptide binding protein, complex with peptide                                   | 5Y24_B 99.97 |
|          |     | 7-276                                                                                                                          | <i>Bacillus thuringiensis</i> transcriptional activator PlcR protein                                                                                              | 3U3W_B 99.94 |
| J5a_032  | 119 | 1-70                                                                                                                           | <i>Streptococcus suis</i> 05ZYH33 ComR; <i>Streptococcus</i> , Competence, Quorum sensing, ComR, TRANSCRIPTION REGULATOR                                          | 5FD4_B 99.40 |
|          |     | 1-108                                                                                                                          | <i>Streptococcus vestibularis</i> F0396 transcriptional regulator ComR; RNPP family TPR domain HTH domain bacterial signaling peptide binding, TRANSCRIPTION      | 6HU8_A 99.28 |
|          |     | 2-69                                                                                                                           | <i>Staphylococcus aureus</i> Orf20; SaPI, Repressor, STRUCTURAL PROTEIN                                                                                           | 6H49_A 99.20 |
|          |     | 1-119                                                                                                                          | <i>Clostridium difficile</i> 630 putative transposon-related DNA-binding protein                                                                                  | 3IVP_B 99.18 |
| J5a_033  | 75  | 4-71                                                                                                                           | <i>Cytophaga hutchinsonii</i> uncharacterized protein                                                                                                             | 3OMT_B 99.10 |
|          |     | 4-72                                                                                                                           | <i>Streptococcus suis</i> 05ZYH33 ComR; <i>Streptococcus</i> , Competence, Quorum sensing, ComR, TRANSCRIPTION REGULATOR                                          | 5FD4_B 99.07 |
|          |     | 1-69                                                                                                                           | <i>Bacillus thuringiensis</i> transcriptional activator PlcR protein                                                                                              | 3U3W_B 99.06 |
| J5a_040  | 77  | 1-63                                                                                                                           | <i>Methanococcus maripaludis</i> S2 conserved uncharacterized archaeal protein                                                                                    | 2QZG_C 91.42 |
|          |     | 2-63                                                                                                                           | <i>Thermoplasma acidophilum</i> UPF0147 protein Ta0600                                                                                                            | 2QSB_A 85.94 |
|          |     | 12-47                                                                                                                          | <i>Drosophila melanogaster</i> maternal effect protein oskar; 3'-UTR, dimerization, RNA BINDING PROTEIN                                                           | 5CD8_B 82.23 |
|          |     | 1-41                                                                                                                           | <i>Bacillus subtilis</i> PROTEIN (SINI PROTEIN); TRANSCRIPTION REGULATOR                                                                                          | 1B0N_B 80.87 |
| J5a_044* | 59  | 4-55                                                                                                                           | <i>Cluyveromyces lactis</i> (strain ATCC 8585/CBS 2359/DSM 70799/NBRC 1267/NRRL Y-1140/WM37) mRNA decay, decapping, Nudix, nucleotide analog, TRANSLATION         | 6AM0_D 93.80 |
|          |     | 5-58                                                                                                                           | <i>Staphylococcus aureus</i> host factor for Q beta; Hfq, hexamer, RNA binding protein, translational regulator, Sm motif, TRANSLATION                            | 1KQ1_H 91.35 |
|          |     | 5-45                                                                                                                           | <i>Listeria monocytogenes</i> protein hfq; LSm/Sm proteins, RNA chaperone, RNA BINDING PROTEIN                                                                    | 4NL2_C 90.52 |
| J5a_047* | 77  | 10-71                                                                                                                          | <i>Pyrococcus furiosus</i> DNA double-strand break repair rad50 ATPase; zinc finger, rad50, DNA repair, Recombination                                             | 1L8D_A 95.80 |
|          |     | 12-62                                                                                                                          | <i>Saccharomyces cerevisiae</i> Protein PCF11; zinc-binding, mRNA, RNA processing, RNA binding protein                                                            | 5M9Z_A 95.59 |
|          |     | 10-70                                                                                                                          | <i>Pyrococcus furiosus</i> (strain ATCC 43587/DSM 3638/JCM 8422/Vc1) DNA double-strand break repair Rad50 ATPase; double strand break repair, DNA damage response | 6ZFF_B 94.40 |
| J5a_051* | 83  | 12-39                                                                                                                          | <i>Homo sapiens</i> Myc-binding protein; conserved hypothetical protein                                                                                           | 2YY0_D 92.37 |
|          |     | 3-44                                                                                                                           | <i>Escherichia coli</i> cell division protein ZAPB                                                                                                                | 2JEE_C 91.88 |
|          |     | 3-44                                                                                                                           | <i>Bacillus subtilis</i> 168 initiation-control protein YabA; YabA, DnaA, DnaN,                                                                                   | 5DOL_B 91.42 |

|         |     |       |                                                                                                                                            |        |       |
|---------|-----|-------|--------------------------------------------------------------------------------------------------------------------------------------------|--------|-------|
|         |     |       | Zinc finger, initiation control, replication                                                                                               |        |       |
| J5a_053 | 62  | 12-58 | <i>Saccharomyces cerevisiae</i> (strain ATCC 204508/S288c) mediator of RNA polymerase II transcription subunit 4; transcription initiation | 5OQM_h | 90.44 |
|         |     | 1-30  | <i>Haloarcula marismortui</i> 50S ribosomal protein LX; 50S ribosomal subunit, ribonucleoprotein, RNA binding, tRNA binding, metal binding | 4V9F_6 | 88.95 |
|         |     | 1-30  | <i>Escherichia coli</i> bacterial RNA polymerase inhibitor                                                                                 | 4LLG_N | 88.74 |
| J5a_056 | 74  | 1-30  | <i>Enterobacteria</i> phage T7 bacterial RNA polymerase inhibitor                                                                          | 2LMC_A | 87.03 |
|         |     | 2-27  | <i>De Novo</i> protein coiled-coil Trimer with Glu:Val:Lys Triad                                                                           | 6Q1W_B | 88.30 |
| J5a_059 | 63  | 3-35  | Bovine Adenovirus 3 assembly intermediate                                                                                                  | 3ZIF_O | 87.40 |
|         |     | 35-55 | <i>Clostridium botulinum</i> Bot.2110.4; mini-protein binder, inhibitor, TOXIN                                                             | 5VMR_C | 93.20 |
|         |     | 30-54 | <i>Homo sapiens</i> coiled-coil domain-containing protein 90B, mitochondrial, general control protein GCN4                                 | 6H9M_C | 91.48 |
| J5a_060 | 84  | 12-61 | <i>Silicibacter</i> sp. uncharacterized peroxidase-related protein; YP_614459.1                                                            | 2PFX_A | 89.37 |
|         |     | 2-66  | <i>Homo sapiens</i> general transcription factor IIE subunit 1                                                                             | 5GPY_A | 98.90 |
|         |     | 2-70  | <i>Pyrococcus furiosus</i> transcription factor E                                                                                          | 6PLN_A | 98.76 |
| J5a_061 | 48  | 2-71  | <i>Saccharomyces cerevisiae</i> (strain ATCC 204508/S288c) transcription initiation factor IIE subunit alpha                               | 6GYM_W | 98.73 |
|         |     | 1-42  | <i>Thermococcus kodakarensis</i> DNA-directed RNA polymerase subunit P                                                                     | 4QIW_W | 97.60 |
|         |     | 2-35  | <i>Pyrococcus furiosus</i> rubrerythrin; Non heme iron peroxidases, oxidative stress                                                       | 3PWF_B | 96.41 |
| J5a_062 | 137 | 1-46  | <i>Pyrococcus furiosus</i> hypothetical protein Pf0610; winged-helix like protein with metal binding site                                  | 2GMG_A | 95.34 |
|         |     | 2-45  | <i>Thermococcus kodakarensis</i> DNA-directed RNA polymerase subunit P                                                                     | 4QIW_W | 96.60 |
|         |     | 4-45  | <i>Sulfolobus shibatae</i> DNA-directed RNA polymerase                                                                                     | 4AYB_P | 95.63 |
| J5a_063 | 127 | 1-78  | HNH endonuclease; Thermophilic bacteriophage, HNH Endonuclease, DNA nicking, HYDROLASE; 1.52A { <i>Geobacillus</i> virus E2}               | 5HOM_A | 99.83 |

**Table S7.** Results of HHpred analysis of selected F16Ba and z1a phage proteins of no homologs among proteins of J5a phage. The best and most relevant hits are shown, including the coordinates of the matching regions, PDB ID and chain identifier, and the HHpred probability (%) in the matched region. Only proteins HHpred probability results over 80% are presented. Corresponding proteins are given in parentheses. ORFs unique for a particular phage are marked with an asterisk. Corresponding proteins were assessed as those sharing more than 70% sequence identity, according to BLASTp.

| ORF                 | Protein length (aa) | Matched residues (aa) | HHpred best match                                                                                                                                                 | PDB ID | Probability (%) |
|---------------------|---------------------|-----------------------|-------------------------------------------------------------------------------------------------------------------------------------------------------------------|--------|-----------------|
| F16Ba_020 (z1a_020) | 197                 | 74-194                | <i>Escherichia coli</i> conjugal transfer protein trwb; coupling protein, bacterial conjugation, fl1-atpase-like quaternary structure, ring helicases             | 1E9R_A | 99.52           |
|                     |                     | 75-196                | <i>Legionella pneumophila</i> IcmO (DotL); Protein Complex, Secretion, Secretion systems, Gram-negative bacteria, type 4 secretion system, T4SS, coupling protein | 6SZ9_A | 99.39           |
|                     |                     | 88-197                | <i>Thermoanaerobacter pseudethanolicus</i> type IV secretory pathway virb4 components-like protein; hydrolase                                                     | 4AG6_B | 99.04           |
|                     |                     | 57-196                | <i>Sulfolobus solfataricus</i> hera; hydrolase, nura, helicase, translocase                                                                                       | 4D2I_B | 98.96           |
| F16Ba_030 *         | 444                 | 35-413                | <i>Bacillus</i> phage SPbeta AimR transcriptional regulator; DNA binding protein, peptide binding protein                                                         | 5Y24_A | 100             |
|                     |                     | 37-410                | <i>Bacillus</i> phage phi3T AimR transcriptional regulator                                                                                                        | 5ZVV_A | 100             |
|                     |                     | 33-299                | <i>Bacillus thuringiensis</i> transcriptional activator PlcR protein                                                                                              | 3U3W_A | 99.92           |
| z1a_046*            | 132                 | 1-115                 | <i>Streptococcus pneumoniae</i> lipoprotein; lipocalin, PccL, virulence, transport protein                                                                        | 5CYB_A | 97.02           |
|                     |                     | 1-88                  | <i>Mycobacterium smegmatis</i> MC2 51 superoxide dismutase [Cu-Zn]; Respiratory, Supercomplex, SOD, Mycobacterium, ETC, Lipoprotein, ELECTRON TRANSPORT           | 6ADQ_Z | 96.53           |
|                     |                     | 1-118                 | <i>Pseudomonas aeruginosa</i> chaperone CupB2; Ig fold, periplasmic chaperone                                                                                     | 3Q48_A | 93.31           |

**Table S8.** Amino acid sequence identity analysis between proteins of J5a bacteriophage and relevant proteins or proteins encoded by similar genome regions of other known or proposed members of *Wbetavirus* genus phages. Asterisks mark ORFs for which their lengths were altered according to their detailed translation analysis. Green color marks newly added ORFs.

| J5a ORF no. | No. of amino acid residues | Known or predicted function                       | z1a       | F16Ba     | Carmel_SA | Tavor_SA          | Negev_SA  | AP631              | Fah                | Wbeta              | Cherry             | Gamma isolate 53   | Gamma isolate 51   | Gamma isolate D'Herelle |
|-------------|----------------------------|---------------------------------------------------|-----------|-----------|-----------|-------------------|-----------|--------------------|--------------------|--------------------|--------------------|--------------------|--------------------|-------------------------|
| 1.          | 161                        | Terminase small subunit                           | 154/161   | 158/161   | 153/161   | 159/161           | 159/161   | 158/161            | 158/161            | 158/161            | 158/161            | 158/161            | 158/161            | 158/161                 |
| 2.          | 565                        | Terminase large subunit                           | 556/565   | 555/565   | 556/565   | 562/565           | 562/565   | 561/565            | 560/565            | 559/565            | 558/565            | 559/565            | 558/565            | 558/565                 |
| 3.          | 432                        | Portal protein                                    | 424/432   | 425/432   | 425*/432  | 423*/432          | 422*/432  | 424/432            | 424*/432           | 424/432            | 424/432            | 424/432            | 424/432            | 424/432                 |
| 4.          | 206                        | Prohead protease                                  | 202/206   | 203/206   | 203*/206  | 202/206           | 202/206   | 203/206            | 203/206            | 203/206            | 203/206            | 203/206            | 203/206            | 203/206                 |
| 5.          | 392                        | Major capsid protein                              | 385/392   | 378/392   | 379/392   | 385/392           | 379/392   | 385/392            | 379/392            | 379/392            | 379/392            | 379/392            | 379/392            | 379/392                 |
| 6.          | 96                         | Head-tail connector protein                       | 95/96     | 94/96     | 95/96     | 95/96             | 95/96     | 95/96              | 95/96              | 95/96              | 95/96              | 95/96              | 95/96              | 95/96                   |
| 7.          | 107                        | Head-tail adaptor protein                         | 101/107   | 104/107   | 100/107   | 96/107            | 105/107   | 104/107            | 105/107            | 105/107            | 105/107            | 105/107            | 105/107            | 105/107                 |
| 8.          | 146                        | Hypothetical protein                              | 146/146   | 146/146   | 145/146   | 111/145           | 146/146   | 115/145            | 145/146            | 145/146            | 145/146            | 145/146            | 145/146            | 145/146                 |
| 9.          | 119                        | DUF3168 domain protein                            | 114/119   | 117/119   | 114/119   | 104/119           | 117*/119  | 115/119            | 118/119            | 118/119            | 118/119            | 118/119            | 118/119            | 118/119                 |
| 10.         | 202                        | Major tail protein                                | 197/202   | 194/202   | 177/202   | 195/202           | 195/202   | 176/202            | 195/202            | 195/202            | 195/202            | 195/202            | 195/202            | 195/202                 |
| 11.         | 105                        | Hypothetical protein                              | 104/105   | 75/105    | 105/105   | 77/105            | 75/105    | 75/105             | 75/105             | 75/105             | 75/105             | 75/105             | 75/105             | 75/105                  |
| 12.         | 64                         | Hypothetical protein                              | 63/64     | 53/58     | 57/58     | 46/58             | -         | 33/37              | 53/58              | 53/58              | 53/58              | 53/58              | 53/58              | 53/58                   |
| 13.         | 1283                       | Tail length tape-measure protein                  | 1192/1283 | 1251/1283 | 1219/1283 | 800/845 + 394/438 | 1250/1283 | 1219/1283          | 1203/1283          | 1203/1283          | 1203/1283          | 1203/1283          | 1203/1283          | 1203/1283               |
| 14.         | 496                        | Distal tail protein                               | 444/496   | 447/496   | 441/496   | 450/496           | 448/496   | 445/496            | 444/496*           | 443/496            | 444/496*           | 443/496*           | 444/496*           | 444/496                 |
| 15.         | 1309                       | Tal/RBP (Tail lysozyme/receptor-binding protein)  | 1155/1308 | 1083/1355 | 1075/1321 | 1076/1332         | 1036/1332 | 1095/1309          | 1024/1288          | 1057/1331          | 1023/1288          | 1025/1288          | 1025/1288          | 1057/1331               |
| 16.         | 78                         | XpaF1 protein (hemolysin of Xhla1 protein family) | 72/78     | 72/78     | 71/78     | 71/78             | 71/78     | -                  | -                  | -                  | -                  | -                  | -                  | -                       |
| 17.         | 79                         | Holin                                             | 73/79     | 78/79     | 73/79     | 73/79             | 74/79     | -                  | -                  | -                  | -                  | -                  | -                  | -                       |
|             |                            | Holin                                             |           |           |           |                   |           | unrelated (141 aa)      |
| 18.         | 351                        | N-acetylmuramoyl-L-alanine amidase                | 334/351   | 331/351   | 332/351   | 334/351           | 333/351   | -                  | -                  | -                  | -                  | -                  | -                  | -                       |
|             |                            | N-acetylmuramoyl-L-alanine amidase                |           |           |           |                   |           | unrelated (233 aa)      |
| 19.         | 108                        | Hypothetical protein                              | 103/109   | 99/109    | 102/109*  | 86/109*           | 100/109   | -                  | -                  | -                  | -                  | -                  | -                  | -                       |
|             |                            | Predicted lipoprotein                             |           |           |           |                   |           | unrelated (163 aa) | unrelated (165 aa) | unrelated (165 aa) | unrelated (163 aa) | unrelated (165 aa) | unrelated (165 aa) | unrelated (165 aa)      |

|     |     |                                                                                            |                       |                       |                       |                       |                       |                    |          |         |          |          |          |         |
|-----|-----|--------------------------------------------------------------------------------------------|-----------------------|-----------------------|-----------------------|-----------------------|-----------------------|--------------------|----------|---------|----------|----------|----------|---------|
|     |     |                                                                                            | unrelated<br>(194 aa) | unrelated<br>(197 aa) | unrelated<br>(197 aa) | unrelated<br>(163 aa) | unrelated<br>(194 aa) |                    |          |         |          |          |          |         |
|     |     | Hypothetical protein, partly<br>similar to J5a ORF033                                      |                       |                       |                       | (60 aa)               |                       |                    |          |         |          |          |          |         |
| 20. | 64  | Repressor protein                                                                          | 58/65                 | 57/65                 | 57/65*                | 22/67*                | 51/65                 | 22/70              | 22/70    | 22/70   | 22/70    | 22/70    | 22/70    | 22/70   |
| 21. | 100 | Hypothetical protein                                                                       | 88/102                | 91/102                | 87/102                | 86/102                | 86/102*               | 93/102             | 93/102   | 93/102  | 93/102   | 93/102   | 93/102   | 93/102  |
| 22. | 60  | Hypothetical protein                                                                       | 54/60                 | 55/60                 | 55/60                 | 55/60                 | 54/60                 | 55/60              | 55/60    | 55/60   | 55/60    | 55/60    | 55/60    | 55/60   |
| 23. | 429 | FtsK/SpoIIIE family protein<br>(cell division protein FtsK)                                | 405/429               | 424/429               | 407/429               | 407/429               | 405/429 *             | 376/397 +<br>38/65 | 409/429  | 409/429 | 409/429* | 409/429* | 409/429* | 409/429 |
| 24. | 210 | Conserved phage protein                                                                    | 206/210               | 209/210               | 204/210*              | 205/210*              | 203/210*              | 204/210*           | 205/210* | 205/210 | 205/210* | 204/210* | 205/210* | 205/210 |
| 25. | 78  | HTH cro/C1-type domain-<br>containing protein (putative<br>transcription regulator)        | 75/78                 | 78/78                 | 75/78                 | -                     | -                     | -                  | 78/78    | 78/78   | 78/78    | 78/78    | 78/78    | 78/78   |
|     |     | Putative transcriptional<br>regulator of Xre family,<br>putative phage repressor           |                       |                       |                       | unrelated<br>(72)     | unrelated<br>(72)     | unrelated<br>(72)  |          |         |          |          |          |         |
| 26. | 39  | Hypothetical protein                                                                       | 29/39                 | 39/39                 | 29/39                 | 26/39                 | 25/39                 | 26/39              | 39/39    | 39/39   | 39/39    | 39/39    | 39/39    | 39/39   |
| 27. | 287 | Conserved phage protein<br>(HTH cro/C1-type domain-<br>containing protein)                 | 269/287               | 281/287               | 263/287               | 275/287               | 269/287               | 263/287            | 280/287  | 280/287 | 280/287  | 280/287  | 280/287  | 280/287 |
| 28. | 484 | Site-specific recombinase                                                                  | 469/484               | 262/481               | 260/480               | 467/484*              | 263/481               | 259/481            | 261/481  | 261/481 | 261/481  | 261/481  | 261/481  | 261/481 |
| 29. | 428 | Transcriptional regulator<br>(AimR family lysis-lysogeny<br>pheromone receptor)            | 425/428               | 215/414               | 339/428               | 422/428               | 217/414               | 218/414            | 215/414  | 215/414 | -        | -        | -        | -       |
| 30. | 46  | AimP                                                                                       | 44/46                 | 14/46                 | 32/46                 | 45/46                 | 14/46                 | 17/46              | 14/46    | 14/46   | -        | -        | -        | -       |
| 31. | 51  | Hypothetical protein                                                                       | 46/51                 |                       |                       | 48/51                 |                       |                    |          |         |          |          |          |         |
| 32. | 119 | Hypothetical protein<br>(HTH Cro/C1 family<br>protein), transcriptional<br>regulator of Xr | 118/119               | 90/117                | 91*/117               | 118/119               | 90/117*               | 91/117*            | 90/118   | 90/118  | -        | -        | 28/36    | 28/36   |
| 33. | 75  | Hypothetical protein (HTH<br>Cro/C1 family protein)                                        | 72/75                 | 61/75                 | 61/75                 | 75/75                 | 61/75                 | 61/75              | 61/75    | 61/75   | -        | -        | 61/75    | 61/75   |
| 34. | 55  | Hypothetical protein                                                                       | 54/55*                | 16/52                 | 16/52                 | 53/55*                | 16/52                 | 15/52              | 16/52    | 16/52*  | 16/52    | 16/52    | 16/52    | 16/52*  |
| 35. | 51  | Hypothetical protein                                                                       | 47/51                 | 48/51                 | 43/53                 | 48/51                 | 42/51                 | 48/51              | 48/51    | 48/51   | 48/51    | 48/51    | 48/51    | 48/51   |
| 36. | 248 | Putative antirepressor                                                                     | 245/248               | 242/248               | 243/248               | 147/275               | 23/227                | 146/275            | 145/271  | 145/271 | 145/271  | 145/271  | 145/271  | 145/271 |
|     |     | Hypothetical protein                                                                       | unrelated<br>(125)    | unrelated<br>(125)    | unrelated<br>(125)    |                       |                       |                    |          |         |          |          |          |         |
| 37. | 217 | Hypothetical protein                                                                       | 117/216               | 121/216               | 119/216               | 188/217*              | 127/216*              | 166/175<br>50/55   | 188/217  | 188/217 | 188/217  | 188/217  | 188/217  | 188/217 |
| 38. | 306 | Replication initiation protein                                                             | 283/322               | 277/313               | 286/316*              | 277/323*              | 291/311*              | 288/305            | 276/306* | 294/315 | 294/315* | 286/315* | 294/315* | 294/315 |

[illegible]

|     |     |                                                                                                                                                                                                                                                                                                     |         |         |         |         |         |        |          |          |         |         |         |          |
|-----|-----|-----------------------------------------------------------------------------------------------------------------------------------------------------------------------------------------------------------------------------------------------------------------------------------------------------|---------|---------|---------|---------|---------|--------|----------|----------|---------|---------|---------|----------|
|     |     | phages, present in many strains of <i>B. thuringiensis</i> and other bacteria, putative glucose epimerase (HHpred 7740054)                                                                                                                                                                          |         |         |         |         |         |        |          |          |         |         |         |          |
| 47. | 77  | Hypothetical protein, only in J5a and Tavor_SA among wbetaviruses; identical or nearly identical proteins are encoded by several <i>Bacillus</i> strains                                                                                                                                            | -       | -       | -       | 75/77   | -       | -      | -        | -        | -       | -       | -       | -        |
| 48. | 53  | Hypothetical protein, only in J5a among wbetavirus phages, present in 12 other phages; identical or nearly identical protein is encoded by many strains of various <i>Bacillus</i> species                                                                                                          | -       | -       | -       | -       | -       | -      | -        | -        | -       | -       | -       | -        |
| 49. | 38  | Hypothetical protein, only in J5a among phages                                                                                                                                                                                                                                                      | -       | -       | -       | -       | -       | -      | -        | -        | -       | -       | -       | -        |
| 50. | 146 | Hypothetical protein, only in J5a among wbetavirus phages, nearly identical in N-terminal moiety to the N-terminal moiety of an uncultured phage protein 9AX2_46; identical or nearly identical protein in their N-terminal moieties are encoded by many strains of various <i>Bacillus</i> species | -       | -       | -       | -       | -       | -      | -        | -        | -       | -       | -       | -        |
| 51. | 83  | Hypothetical protein; only in J5a among wbetavirus phages, nearly identical in N-terminal moiety to the C-terminal moiety of an uncultured phage protein 9AX2_46                                                                                                                                    | -       | -       | -       | -       | -       | -      | -        | -        | -       | -       | -       | -        |
| 52. | 96  | Hypothetical protein; only in J5a among wbetavirus phages, nearly identical to a <i>B. thuringiensis</i> protein                                                                                                                                                                                    | -       | -       | -       | -       | -       | -      | -        | -        | -       | -       | -       | -        |
| 53. | 62  | Hypothetical protein; putative inhibitor of RNA polymerase (HHpred 5227104; E=0.025, Probability 96.15)                                                                                                                                                                                             | 55/62   | 57/62   | 54/62   | 56/62   | 56/79   | 54/62  | 56/79    | 56/79    | 56/79   | 56/79   | 56/79   | 56/79    |
| 54. | 40  | Hypothetical protein                                                                                                                                                                                                                                                                                | 39/40   | 38/40   | 38/40   | 40/40   | 40/40   | 36/40  | 39/40    | 39/40    | 39/40   | 39/40   | 39/40   | 39/40    |
| 55. | 131 | RNA polymerase sigma factor,                                                                                                                                                                                                                                                                        | 127/131 | 128/131 | 127/131 | 127/131 | 129/131 | 129/13 | 129/131* | 129/131* | 129/131 | 129/131 | 129/131 | 129/131* |

[illegible]



|             |     |                                                                                    |     |
|-------------|-----|------------------------------------------------------------------------------------|-----|
| 00037199.1  | 1   | MRTPSGILHVDFKTDQIVAAIQPEDYWDKRWHELKNNVMDLDTAFDGDTHAVALLQQNLVLKEVRDGRIVPYVITET      | 80  |
| 00037255.1  | 1   | MRTPSGILHVDFKTDQIVAAIQPEDYWDKRWHELKNNVMDLDTAFDGDTHAVTLQQNLVLKEVRDGRIVPYVITET       | 80  |
| ARW58514.1  | 1   | MSTPSGILHVDFKTDQIVAAIQPEDYWDKRWHELKNNVMDLDTAFDGDTHAVTLQQNLVLKEVRDGRIVPYVITET       | 80  |
| ARW58396.1  | 1   | MRTPSGILHVDFKTDQIVAAIQPEDYWDKRWHELKNNVMDLDTAFDGDTHAVTLQQNLVLKEVRDGRIVPYVITET       | 80  |
| AZF88360.1  | 1   | MRTPSGILHVDFKTDQIVAAIQPEDYWDKRWHELKNNVMDLDTAFDGDTHAVTLQQNLVLKEVRDGRIVPYVITET       | 80  |
| YP 459979.1 | 1   | MRTPSGILHVDFKTDQIVAAIQPEDYWDKRWHELKNNVMDLDTAFDGDTHAVTLQQNLVLKEVRDGRIVPYVITET       | 80  |
| 00037148.1  | 1   | MRTPSGILHVDFKTDQIIAAIQPDYWDKRWHELKNNVMDLDTAFDGDSDSATLQQNLVLKEVRDGRIVPYVITET        | 80  |
| ARW58457.1  | 1   | MRTPSGILHVDFKTDQIVAAIQPEDYWDKRWHELKNNVMDLDTAFDGDTHAVTLQQNLVLKEVRDGRIVPYVITET       | 80  |
| ABA46383.1  | 1   | MRTPSGILHVDFKTDQIVAAIQPEDYWDKRWHELKNNIDMLDTAFDGDTHAVTLQQNLVLKEVRDGRIVPYVITET       | 80  |
| YP 338198.1 | 1   | MRTPSGILHVDFKTDQIVAAIQPEDYWDKRWHELKNNIDMLDTAFDGDTHAVTLQQNLVLKEVRDGRIVPYVITET       | 80  |
| YP 512324.1 | 1   | MRTPSGILHVDFKTDQIVAAIQPEDYWDKRWHELKNNIDMLDTAFDGDTHAVTLQQNLVLKEVRDGRIVPYVITET       | 80  |
| 00037199.1  | 81  | EKNSDNRSITTYASGAWVQIAKSGVIKQRIESKTVNEFIDMALIGMKWQERGQTDYAGFHTMTIDEFLDPLTFLKKIASL   | 160 |
| 00037255.1  | 81  | EKNSDTRSITTYASGAWIQIAKSGIIPQRIESKTVNEFIDLALLGMKWQRGITEYAGFHTMTIDEYIDPLTFLKKIASL    | 160 |
| ARW58514.1  | 81  | EKNSDTRSITTYASGAWIQIAKSGIIPQRIESKTVNEFIDLALLGMKWQRGITEYAGFHTMTIDEYIDPLTFLKKIASL    | 160 |
| ARW58396.1  | 81  | EKNSDKRFITTYASGAWIQIAKSGVIKQRIESKTVNEFIDLALLGMKWQRGITEYAGFHTMTIDEYIDPLTFLKKIASL    | 160 |
| AZF88360.1  | 81  | EKNSDTRSITTYASGAWIQIAKSGIIPQRIESKTVNEFIDLALLGMKWQRGVTEYAGFHTMTIDEYIDPLTFLKKIASL    | 160 |
| YP 459979.1 | 81  | EKNSDTRSITTYASGAWIQIAKSGIIPQRIESKTVNEFMDLALLGMKWQRGITEYAGFHTMTIDEYIDPLTFLKKIASL    | 160 |
| 00037148.1  | 81  | EKNSDKRSITTYASGAWIQIAKSGVIKQRIESKTVNEFIDLALLGMKWQRGITEYAGFHTMTIDEYIDPLTFLKKIASL    | 160 |
| ARW58457.1  | 81  | EKNSDKRSITTYASGAWIQIAKSGVIKQRIESKTVNEFMDLALLGMKWQRGITEYAGFHTMTIDEYIDPLTFLKKIASL    | 160 |
| ABA46383.1  | 81  | EKNSDKRSITTYASGAWIQIAKSGVIKQRIESKTVNEFMDLALLGMKWQRGVTEYAGFHTMTIDEYMDSLTFLKKIASL    | 160 |
| YP 338198.1 | 81  | EKNSDKRSITTYASGAWIQIAKSGVIKQRIESKTVNEFMDLALLGMKWQRGVTEYAGFHTMTIDEYMDSLTFLKKIASL    | 160 |
| YP 512324.1 | 81  | EKNSDKRSITTYASGAWIQIAKSGVIKQRIESKTVNEFMDLALLGMKWQRGVTEYAGFHTMTIDEYMDSLTFLKKIASL    | 160 |
| 00037199.1  | 161 | FKLEIQYRVEVKGSKIIGWYVMDIQKRGRDGTKEIELGKDLGVTRIEHTRDICTALVGFVKGEGDKVITIESINKGLPY    | 240 |
| 00037255.1  | 161 | FKLEIRYRVEIKGSRIGWYVMDIQKRGRDGTKEIELGKDLGVTRIEHTRNICALVGFVKGEGDKVITIESINKGLPY      | 240 |
| ARW58514.1  | 161 | FKLEIRYRVEIKGSRIGWYVMDIQKRGRDGTKEIELGKDLGVTRIEHTRNICALVGFVKGEGDKVITIESINKGLPY      | 240 |
| ARW58396.1  | 161 | FKLEIRYRVEIKGSRIGWYVMDIQKRGRDGTKEIELGKDLGVTRIEHTRNICALVGFVKGEGDKVITIESINKGLPY      | 240 |
| AZF88360.1  | 161 | FKLEIRYRVEIKGSRIGWYVMDIQKRGRDGTKEIELGKDLGVTRIEHTRNICALVGFVKGEGDKVITIESINKGLPY      | 240 |
| YP 459979.1 | 161 | FKLEIRYRVEIKGSRIGWYVMDIQKRGRDGTKEIELGKDLGVTRIEHTRNICALVGFVKGEGDKVITIESINKGLPY      | 240 |
| 00037148.1  | 161 | FKLEIRYRVEIKGSKIIGWYVMDIQKRGRDGTKEIELGKDXGVTRIEHTRNICALVGFVKGEGDKVITIESINKGLPY     | 240 |
| ARW58457.1  | 161 | FKLEIRYRVEIKGSRIGWYVMDIQKRGRDGTKEIELGKDLGVTRIEHTRNICALVGFVKGEGDKVITIESINKGLPY      | 240 |
| ABA46383.1  | 161 | FKLEIRYRVEIKGSKIIGWYVMDIQKRGRDGTKEIELGKDXGVTRIEHTRNICALVGFVKGEGDKVITIESINKGLPY     | 240 |
| YP 338198.1 | 161 | FKLEIRYRVEIKGSKIIGWYVMDIQKRGRDGTKEIELGKDLGVTRIEHTRNICALVGFVKGEGDKVITIESINKGLPY     | 240 |
| YP 512324.1 | 161 | FKLEIRYRVEIKGSKIIGWYVMDIQKRGRDGTKEIELGKDLGVTRIEHTRNICALVGFVKGEGDKVITIESINKGLPY     | 240 |
| 00037199.1  | 241 | IVDADAFQRWNEHGQHKFGFYTPETEELDMPKRLTLMEIELKKRVNSSISYEVAQSIGRIFGLEHELINEGDTIKIK      | 320 |
| 00037255.1  | 241 | IVDADAFQRWNEHGQHKFGFYTPETEELDMPKRLTLMEIELKKRVNSSISYEVAQSIGRIFGLEHELINEGDTIKIK      | 320 |
| ARW58514.1  | 241 | IVDADAFQRWNEHGQHKFGFYTPETEELDMPKRLTLMEIELKKRVNSSISYEVAQSIGRIFGLEHELINEGDTIKIK      | 320 |
| ARW58396.1  | 241 | IVDADAFQRWNEHGQHKFGFYTPETEELDMPKRLTLMEIELKKRVNSSISYEVAQSIGRIFGLEHELINEGDTIKIK      | 320 |
| AZF88360.1  | 241 | IVDADAFQRWNEHGQHKFGFYTPETEELDMPKRLTLMEIELKKRVNSSISYEVAQSIGRIFGLEHELINEGDTIKIK      | 320 |
| YP 459979.1 | 241 | IVDADAFQRWNEHGQHKFGFYTPETEELDMPKRLTLMEIELKKRVNSSISYEVAQSIGRIFGLEHELINEGDTIKIK      | 320 |
| 00037148.1  | 241 | IVDADAFQRWNEHGQHKFGFYTPETEELDMPKRLTLMEIELKKRVNSSISYEVAQSIGRIFGLEHELINEGDTIKIK      | 320 |
| ARW58457.1  | 241 | IVDADAFQRWNEHGQHKFGFYTPETEELDMPKRLTLMEIELKKRVNSSISYEVAQSIGRIFGLEHELINEGDTIKIK      | 320 |
| ABA46383.1  | 241 | IVDADAFQRWNEHGQHKFGFYTPETEELDMPKRLTLMEIELKKRVNSSISYEVAQSIGRIFGLEHELINEGDTIKIK      | 320 |
| YP 338198.1 | 241 | IVDADAFQRWNEHGQHKFGFYTPETEELDMPKRLTLMEIELKKRVNSSISYEVAQSIGRIFGLEHELINEGDTIKIK      | 320 |
| YP 512324.1 | 241 | IVDADAFQRWNEHGQHKFGFYTPETEELDMPKRLTLMEIELKKRVNSSISYEVAQSIGRIFGLEHELINEGDTIKIK      | 320 |
| 00037199.1  | 321 | DTGFTPELYLEARVIAGDESFTDPTQDKYFEGDYREIVNQNEELRKIYNRILSSLGNKQEMIDQLDKLVQNEANETASNAK  | 400 |
| 00037255.1  | 321 | DTGFTPELYLEARVIAGDESFTDPTQDKYFEGDYREIVNQNEELRKIYNRILSSLGNKQEMIDQLDKLVNEANETASNAK   | 400 |
| ARW58514.1  | 321 | DTGFTPELYLEARVIAGDESFTDPTQDKYFEGDYREIVNQNEELRKIYNRILSSLGNKQEMIDQLDKLVNEANETASNAK   | 400 |
| ARW58396.1  | 321 | DTGFTPELYLEARVIAGDESFTDPTQDKYFEGDYREIVNQNEELRKIYNRILSSLGNKQEMIDQLDKLVQNEANETASNAK  | 400 |
| AZF88360.1  | 321 | DTGFTPELYLEARVIAGDESFTDPTQDKYFEGDYREIVNQNEELRKIYNRILSSLGNKQEMIDQLDKLVQNEANETASNAK  | 400 |
| YP 459979.1 | 321 | DTGFTPELYLEARVIAGDESFTDPTQDKYFEGDYREIVNQNEELRKIYNRILSSLGNKQEMIDQLDKLVQNEANETASNAK  | 400 |
| 00037148.1  | 321 | DTGFTPELYLEARVIAGDESFTDPTQDKYFEGDYREIVNQNEELRKIYNRILSSLGNKQEMIDQLDKLVQNEANETASNAK  | 400 |
| ARW58457.1  | 321 | DTGFTPELYLEARVIAGDESFTDPTQDKYFEGDYREIVNQNEELRKIYNRILSSLGNKQEMIDQLDKLVNEANETASNAK   | 400 |
| ABA46383.1  | 321 | DTGFTPELYLEARVIAGDESFTDPTQDKYFEGDYREIVNQNEELRKIYNRILSSLGNKQEMIDQLDKLVNEANETASNAK   | 400 |
| YP 338198.1 | 321 | DTGFTPELYLEARVIAGDESFTDPTQDKYFEGDYREIVNQNEELRKIYNRILSSLGNKQEMIDQLDKLVNEANETASNAK   | 400 |
| YP 512324.1 | 321 | DTGFTPELYLEARVIAGDESFTDPTQDKYFEGDYREIVNQNEELRKIYNRILSSLGNKQEMIDQLDKLVNEANETASNAK   | 400 |
| 00037199.1  | 401 | KESEAAKALAEKVQENIKNNTVDIEAMNPPTGLKPKFTLWRDISNGKPGILKIWTGAWESVVPDVESVKKETLDQVN      | 480 |
| 00037255.1  | 401 | KESEAAKALAEKVQENIKNNTVEIIEAKNPPTGLKPKFTLWRDISNGKPGILKIWTGAWESVVPDVESVKKETLDQVN     | 480 |
| ARW58514.1  | 401 | KESEAAKALAEKVQENIKNNTVEIIESKNPPTGLKPKFTLWRDISNGKPGILKIWTGAWESVVPDVESVKKETLDQVN     | 480 |
| ARW58396.1  | 401 | KESEAAKALAEKVQENIKNNTVEIIESKNPPTGLKPKFTLWRDISNGKPGILKIWTGAWESVVPDVESVKKETLDQVN     | 480 |
| AZF88360.1  | 401 | KESEAAKALAEKVQENIKNNTVEIIESKNPPTGLKPKFTLWRDISNGKPGILKIWTGAWESVVPDVESVKKETLDQVN     | 480 |
| YP 459979.1 | 401 | KESEAAKALAEKVQENIKNNTVEIIESKNPPTGLKPKFTLWRDISNGKPGILKIWTGAWESVVPDVESVKKETLDQVN     | 480 |
| 00037148.1  | 401 | KESEAAKALAEKVQENIKNNTVEIIESKNPPTGLKPKFTLWRDISNGKPGILKIWTGAWESVVPDVESVKKETLDQVN     | 480 |
| ARW58457.1  | 401 | KESEAAKALAEKVQENIKNNTVEIIESKNPPTGLKPKFTLWRDISNGKPGILKIWTGAWESVVPDVESVKKETLDQVN     | 480 |
| ABA46383.1  | 401 | KESEAAKALAEKVQENIKNNTVEIIESKNPPTGLKPKFTLWRDISNGKPGILKIWTGAWESVVPDVESVKKETLDQVN     | 480 |
| YP 338198.1 | 401 | KESEAAKALAEKVQENIKNNTVEIIESKNPPTGLKPKFTLWRDISNGKPGILKIWTGAWESVVPDVESVKKETLDQVN     | 480 |
| YP 512324.1 | 401 | KESEAAKALAEKVQENIKNNTVEIIESKNPPTGLKPKFTLWRDISNGKPGILKIWTGAWESVVPDVESVKKETLDQVN     | 480 |
| 00037199.1  | 481 | KDIESTKTELNQKVQEAQNQATGQFNEVQEGLGQVSRITSNENKQGEIDKKVTKFEQDSSGFKTSIETLTKKDTEISSK    | 560 |
| 00037255.1  | 481 | KDIETTTKTELNQKVQEAQNQATGQFNEVKESLGQVSRITFDVQNEQGNINKVQTQIEQTSDFGFKTSIESLTKKDTEISSK | 560 |
| ARW58514.1  | 481 | KDIETTTKTELNQKVQEAQNQATGQFNEVKESLGQVSRITSNENKQGEIDNKITKFEQDSSGFKTSIESLTKKDTEISSK   | 560 |
| ARW58396.1  | 481 | KDIETTTKTELNQKVQEAQNQATGQFNEVKESLGQVSRITSNENKQGEIDKKVTKFEQDSSGFKTSIESLTKKDTEISSK   | 560 |
| AZF88360.1  | 481 | KDIETTTKTELNQKVQEAQNQATGQFNEVKESLGQVSRITSDVQNEQGNINKVQTQIEQTSDFGFKTSIETLTKKDTEISSK | 560 |
| YP 459979.1 | 481 | KDIATTTKTELNQKVQEAQNQATGQFNEVKESLGQVSRITSNENKQGEIDKKVTKFEQDSSGFKTSIESLTKKDTEISSK   | 560 |
| 00037148.1  | 481 | KDIETITKTELNQKVQEAQNQATGQFNEVQEGLGQVSRITSSINENKQGEIDKKVTKFEQDSSGFKTSIESLTKKDTEISSK | 560 |
| ARW58457.1  | 481 | KDIETTTKTELNQKVQEAQNQATGQFNEVQEGLGQVSRITSNENKQGEIDKKVTKFEQDSSGFKTSIESLTKKDTEISSK   | 560 |
| ABA46383.1  | 481 | KDIESTKTELNQKVQEAQNQATGQFNEVKESLGQVSRITSNENKQGEIDKKVTKFEQDSSGFKTSIESLTKKDTEISSK    | 560 |
| YP 338198.1 | 481 | KDIESTKTELNQKVQEAQNQATGQFNEVKESLGQVSRITSNENKQGEIDKKVTKFEQDSSGFKTSIESLTKKDTEISSK    | 560 |
| YP 512324.1 | 481 | KDIESTKTELNQKVQEAQNQATGQFNEVKESLGQVSRITSNENKQGEIDKKVTKFEQDSSGFKTSIESLTKKDTEISSK    | 560 |
| 00037199.1  | 561 | LNTVELTVEGKTKTISDVQQTNDLKKTTTIDKEEAGKISTKLEQVEART ---VGGENWLINTGP-----             | 622 |
| 00037255.1  | 561 | LNTVESTVEGKTKTISDVQQTNDLKKTTTIDKEEAGKISTKLEQVEART ---VGGENWLINTGR-----             | 622 |
| ARW58514.1  | 561 | LNTVESTVEGKTKTISDIQSDTSLRKTTTNEIKTAEAGKTELTLQLETKVNDIKIGGPNLFINSGF-----            | 626 |
| ARW58396.1  | 561 | LNTVESTVEGKTKTISDIQSDTSLKQTTTIEKEQAGKISEKLTVEQKYDNMKIGGQNFYKQKSF-----gaagGT        | 632 |
| AZF88360.1  | 561 | LNTVESTVEGKTKTISDIQSDTSLKQTTTIEKEQAGKISEKLTVEQKYDNMKIGGQNFYKQKSF-----gaagGT        | 632 |
| YP 459979.1 | 561 | LNTVESTVEGKTKTISDVQQTNDLKKTTTIDKEEAGKISTKLEQVEART ---NYVINSDFSNVTNSWIGTAT          | 636 |
| 00037148.1  | 561 | LNTVELTVEGKTKTISDVQQTASELTKTTTIEKEEAGRTKERMEQINSKVDGLEVGATNLIDGTEF-----inanGW      | 632 |

|             |      |                                                                                       |      |
|-------------|------|---------------------------------------------------------------------------------------|------|
| ARW58457.1  | 561  | LNTVESTVEGKTKTISDIQSDTTSLKQTTEIKEEQAGKISEKLTSEQKYDNMKIGGQNFYKQKSF-----gaagGT          | 632  |
| ABA46383.1  | 561  | VNTIESTVEGKTKTISDVQQTSDLKKTTEIKEEAGKISEKLSMVETKVNNSDKAGGRNLLL-----GS                  | 624  |
| YP_338198.1 | 561  | VNTIESTVEGKTKTISDVQQTSDLKKTTEIKEEAGKISEKLSMVETKVNNSDKAGGRNLLL-----GS                  | 624  |
| YP_512324.1 | 561  | VNTIESTVEGKTKTISDVQQTSDLKKTTEIKEEAGKISEKLSMVETKVNNSDKAGGRNLLL-----GS                  | 624  |
| 00037199.1  | 623  | -----NEKPQTIG-----MVGGAQVNAKAF-----AVQ-----                                           | 645  |
| 00037255.1  | 623  | -----NQRPQTIG-----MSGGAQVNAKAG-----SFN-----                                           | 645  |
| ARW58514.1  | 627  | -----QNELFSWY-----FHNGKSAIIVSE-----ADE-----                                           | 649  |
| ARW58396.1  | 633  | -----TVKYDENNKWdditipvga-----s-gswkgILYNNKNAKLLVGRAYTISYEIYADE-----                   | 683  |
| AZF88360.1  | 633  | -----TVKYDENNKWdditipvga-----s-gswkgILYNNKNAKLLVGRAYTISYEIYAE-----                    | 683  |
| YP_459979.1 | 637  | -----LFKFVDVNISEasaikkgl-----qitsnkaFVYQKLPADVFKKKKGIASCIYNVSS-----                   | 688  |
| 00037148.1  | 633  | arwgsygTISVKESSLPSlptpgslvietkvngaeqavpn-gtqvqMRSSDRKFVKVKGQKYTVSFNVATSELgwllldy      | 711  |
| ARW58457.1  | 633  | -----TVKYDENNKWdditipvga-----s-gswkgILYNNKNAKLLVGRAYTISYEIYADE-----                   | 683  |
| ABA46383.1  | 625  | -----NVKYEKTDYL-----INQYSLTENFFAGEEYTFVIKGSVPQ-----                                   | 660  |
| YP_338198.1 | 625  | -----NVKYEKTDYL-----INQYSLTENFFAGEEYTFVIKGSVPQ-----                                   | 660  |
| YP_512324.1 | 625  | -----NVKYEKTDYL-----INQYSLTENFFAGEEYTFVIKGSVPQ-----                                   | 660  |
| 00037199.1  | 646  | PgEYIVLecSDH----TDSFYQ---FHLDN TKMGDFEKS KDMT LSLDLQNDvhvdFIlfqfinGVWSEN VQKGV PASN-V | 717  |
| 00037255.1  | 646  | E-DYMIvecTDH---TDSFYQ---FHLDN TKMGDY EKGD MTFSD LQNDvpidLIvfqfinGVWTE NLYSRFPVDN--    | 715  |
| ARW58514.1  | 650  | K-VIKFIpkDGE---SGGVYQRVGAKGNSTVVPFEKEQDYVVTVWLKSSndnqKL-----KISAEGLKSGFVNVGKV         | 718  |
| ARW58396.1  | 684  | V-IPTAI--DIN---NFGVATSTGTNDNDVVAKRIMRTPKTIAGQWVKVS---AT-----FIMPDNITQDFYDN SVI        | 746  |
| AZF88360.1  | 684  | V-IPTAI--DIN---NFGVATSTGTNDNDVVAKRIMRTPKTIAGQWVKVS---AT-----FIMPDNITQDFYDN SVI        | 746  |
| YP_459979.1 | 689  | F-TP-GT--DYP---RLYMRFTYDQNGTEKQYAILKQQEV TNG-WIRIS-----IPFDTTGYTGELKEV                | 745  |
| 00037148.1  | 712  | I-YIMYT--DNA---NQRIPT-INTLDFPIIAKINDRENNN---YYRVK---FT-----F---TATKDD-DNAYL           | 764  |
| ARW58457.1  | 684  | V-IPTAI--DIN---NFGVATSTGTNDNDVVAKRIMRTPKTIAGQWVKVS---AT-----FIMPDNITQDFYDN SVI        | 746  |
| ABA46383.1  | 661  | G-QKFGI--WQNggssNVGYATSVYANGITYVT---FKAVATTSGNERKLS-----L-----YNYPSNTTKAIVE--         | 719  |
| YP_338198.1 | 661  | G-QKFGI--WQNggssNVGYATSVYANGITYVT---FKAVATTSGNERKLS-----L-----YNYPSNTTKAIVE--         | 719  |
| YP_512324.1 | 661  | G-QKFGI--WQNggssNVGYATSVYANGITYVT---FKAVATTSGNERKLS-----L-----YNYPSNTTKAIVE--         | 719  |
| 00037199.1  | 718  | wkrevwtfnidTRATGWgLRRLRFARN-----TNSigkrfrFKKTKLEKGS IPT-----DFSKSTYLEQSV              | 778  |
| 00037255.1  | 716  | wrrrsftfkidSRATGWgLRRLRFARN-----ENsgkkyrFKKAKLEKGSVPT-----DFSKSTYLEQSV                | 776  |
| ARW58514.1  | 719  | wkkhefkfkgTGVGNG---TITFYAD-----VSpigteyflKKPKVEMGN IATEYTTAL EEQVTTDEFTKKTTEIEKSV     | 789  |
| ARW58396.1  | 747  | -----GVGNGW---TPTKITN-----IK-----IRNMQLEEGNIPTSYRIPSEDQVTTDEFTKKTTEIEKSV              | 800  |
| AZF88360.1  | 747  | -----GVGNGW---TPTKITN-----IK-----IRNMQLEEGNIPTSYRIPSEDQVTTDEFTKKTTEIEKSV              | 800  |
| YP_459979.1 | 746  | -----RVNIAT---ADTTTID-----AT-----FTGI MVTFGDLIESWNLAPEDGVTQG VFQSKTTEIEKSV            | 799  |
| 00037148.1  | 765  | -----LIG-GN---TKRALTGsngyawIR-----VNALKVEKGTIATDWDASNNDKVSLPVFEQKTTDIEKSV             | 823  |
| ARW58457.1  | 747  | -----GVGNGW---TPTKITN-----IK-----IRNMQLEEGNIPTSYRIPSEDQVTTDEFTKKTTEIEKSV              | 800  |
| ABA46383.1  | 720  | -----W-----W-----VALYKGNKPQDWTAPAEEQVTTDEFTKKTIEITKSV                                 | 756  |
| YP_338198.1 | 720  | -----W-----W-----VALYKGNKPQDWTAPAEEQVTTDEFTKKTIEITKSV                                 | 756  |
| YP_512324.1 | 720  | -----W-----W-----VALYKGNKPQDWTAPAEEQVTTDEFTKKTIEITKSV                                 | 756  |
| 00037199.1  | 779  | DGVKTTVTNVQNSQAGFEKRMSTVEQTASGLSSTVSNLNNVSDQGGKLT EANTKLEQQATAINAKVELKQVEDYVAGFK      | 858  |
| 00037255.1  | 777  | DGVKTTVSKVQDSQVGFEKRVTTVEQTASGLSSTVSNLNNVSDQGGKLT EANTKLEQQATAIGAKVELKQVEDYVAGFK      | 856  |
| ARW58514.1  | 790  | DGVKTTVTNVQNSQAGYEKRMSNVEQTASGLSSTVSNLNNVSDQGGKLT EANTKLEQQATAIGAKVELKQVEDYVAGFK      | 869  |
| ARW58396.1  | 801  | DGVKTTVTNVQNSQAGFEKRMSTVEQTATGLSSTVSNLNNVSDQGGKLT EANTKLEQQATAIGAKVELKQVEDYVAGFK      | 880  |
| AZF88360.1  | 801  | DGVKTTVTNVQNSQAGFEKRMSTVEQTATGLSSTVSNLNNVSDQGGKLT EANTKLEQQATAIGAKVELKQVEDYVAGFK      | 880  |
| YP_459979.1 | 800  | DGVKTTVTNVQNSQAGFEKRMSTVEQTATGLSSTVSNLNNVSDQGGKLT EANTKLEQQATAIGAKVELKQVEDYVAGFK      | 879  |
| 00037148.1  | 824  | EGIKTTVTKVQDSQAGFEKRMSTVEQTASGLSSTVSNLNNVSDQGGKLT EANTKIEQQATAIGAKVELKQVEDYVAGFK      | 903  |
| ARW58457.1  | 801  | DGIKETITKVENNQSGFENRVATVEKDATS IKQNVSLIQNTQT EQGKLQEA KAGWENTAKALEGKVELKQVEDYVAGFK    | 880  |
| ABA46383.1  | 757  | DGIKETITKVENNQSGFDRVATVEKDATAIKQNVSLIQNTQT EQGRQLQEA KAGWENTAKALEGKVELKQVEDYVAGFK     | 836  |
| YP_338198.1 | 757  | DGIKETITKVENNQSGFDRVATVEKDATAIKQNVSLIQNTQT EQGRQLQEA KAGWENTAKALEGKVELKQVEDYVAGFK     | 836  |
| YP_512324.1 | 757  | DGIKETITKVENNQSGFDRVATVEKDATAIKQNVSLIQNTQT EQGRQLQEA KAGWENTAKALEGKVELKQVEDYVAGFK     | 836  |
| 00037199.1  | 859  | IPELKQTVNQNKQDLLNELANKLATEQFNQKMTLIDNRFINEEGLNAAAKKTEVYTKTQADGQFAKDSYVRDMESRLQL       | 938  |
| 00037255.1  | 857  | IPELKQTVNQNKQDLLNELANKLATEQFNQKMTLIDNRFINEEGLNAAAKKTEVYTKTQADGQFAADS YVRDMESRLQI      | 936  |
| ARW58514.1  | 870  | IPELKQTVDNKNQDLLGELANKLATEQFNQKMTLIDNRFINEEGLNAAAKKTEVYTKTQADGQFATGS YVRDMESRLQL      | 949  |
| ARW58396.1  | 881  | IPELKQTVNQNKQDLLDELANKLATEQFNQKMTLIDNRFINEEGLNAAAKKTEVYTKTQADGQFAKDSYVRDMESRLQL       | 960  |
| AZF88360.1  | 881  | IPELKQTVNQNKQDLLDELANKLATEQFNQKMTLIDNRFINEEGLNAAAKKTEVYTRIQADGQFAKDSYVRDMESRLQL       | 960  |
| YP_459979.1 | 880  | IPELKQTVDNKNQDLLDELANKLATEQFNQKMTLIDNRFINEEGLNAAAKKTEVYTKTQADGQFATDS YVRDMESRLQL      | 959  |
| 00037148.1  | 904  | IPELKQTVNQNKQDLLDELANKLATEQFNQKMTLIDNRFINELGINAAAKKTEVYTIEQANGQFAKDSYVRDMETRLQL       | 983  |
| ARW58457.1  | 881  | IPELKQTVNQNKQDLLDELANKLATEQFNQKMTLIDNRFINEEGLNAAAKKTEVYTKTQADGQFATGS YVRDMETRLQL      | 960  |
| ABA46383.1  | 837  | IPELKQTVNQNKQDLLDELANKLATEQFNQKMTLIDNRFINEEGLNAAAKKTEVYTKTQADGQFATGS YVRDMETRLQL      | 916  |
| YP_338198.1 | 837  | IPELKQTVNQNKQDLLDELANKLATEQFNQKMTLIDNRFINEEGLNAAAKKTEVYTKTQADGQFATGS YVRDMETRLQL      | 916  |
| YP_512324.1 | 837  | IPELKQTVNQNKQDLLDELANKLATEQFNQKMTLIDNRFINEEGLNAAAKKTEVYTKTQADGQFATGS YVRDMETRLQL      | 916  |
| 00037199.1  | 939  | TEKGVSVSVKENDVIAAINMSKENIKLNAARIDLVGKVAEWIKAGLLSGCQIRTSNTDNYVSLDDQFIRLYERGVARAF       | 1018 |
| 00037255.1  | 937  | TEKGVSVSVKENDVIAAFNMSKENIKLNAARIDLVGKVAEWIKAGLLSGCQIRTSNTDNYVSLDDQFIRLYEKGVARSF       | 1016 |
| ARW58514.1  | 950  | TEKGVSVSVKENDVIAAINMSKENIKLHAARIDLVGKVAEWIKAGLLSGCQIRTSNTDNYVSLDDQFIRLYEKGVARSF       | 1029 |
| ARW58396.1  | 961  | TEKGVSVSVKENDVIAAINMSKENIKLNAARIDLVGKVAEWIKAGLLSGCQIRTSNTDNYVSLDDQFIRLYERGVARAF       | 1040 |
| AZF88360.1  | 961  | TEKGVSVSVKENDVIAAINMSKENIKLNAARIDLVGKVAEWIKAGLLSGCQIRTSNTDNYVSLDDQFIRLYERGVARAF       | 1040 |
| YP_459979.1 | 960  | TEKGVSVSVKENDVIAAINMSKENIKLNAARIDLVGKVAEWIKAGLLSGCQIRTSNTDNYVSLDDQFIRLYERGVARAF       | 1039 |
| 00037148.1  | 984  | TEKGVSVSVKENDVIAAINMSKENIKLNAARIDLVGKVAEWIKAGLLSGCQIRTSNTDNYVSLDDQFIRLYERGVARAF       | 1063 |
| ARW58457.1  | 961  | TEKGVSVSVKENDVIAAINMSKENIKLNAARIDLVGKVAEWIKAGLLSGCQIRTSNTDNYVSLDDQFIRLYERGVARAF       | 1040 |
| ABA46383.1  | 917  | TEKGVSVSVKENDVIAAINMSKENIKLNAARIDLVGKVAEWIKAGLLSGCQIRTSNTDNYVSLDDQFIRLYERGVARAF       | 996  |
| YP_338198.1 | 917  | TEKGVSVSVKENDVIAAINMSKENIKLNAARIDLVGKVAEWIKAGLLSGCQIRTSNTDNYVSLDDQFIRLYERGVARAF       | 996  |
| YP_512324.1 | 917  | TEKGVSVSVKENDVIAAINMSKENIKLNAARIDLVGKVAEWIKAGLLSGCQIRTSNTDNYVSLDDQFIRLYERGVARAF       | 996  |
| 00037199.1  | 1019 | LGHYRRSDGAVQPTFILGSDEKTNAPEGTLFMSQAGAGWPGAYASIGISDGI VDGAVQKSVYWELQRNGISVLNANDYQA     | 1098 |
| 00037255.1  | 1017 | LGHYRRTDGVSQPTFILGTDEKTSAPAGALFMSQAGAGWPGAYASIGISDGI VDGTVQKSVYWELQRNGLSVLNANDYHV     | 1096 |
| ARW58514.1  | 1030 | LGHYRRTDGVSQPTFILGTDEKTSAPAGALFMSQAGAGWPGAYASIGISDGI VDGTVQKSVYWELQRNGLSVLNANDYHV     | 1109 |
| ARW58396.1  | 1041 | LGHYRRSDGAVQPTFILGSDEKTNAPEGTLFMSQAGAGWPGAYASIGISNGI VDGAVQKSVYWELQRNGLSVLNANDYHV     | 1120 |
| AZF88360.1  | 1041 | LGHYRRTDGAVQPTFILGSDEKTNAPEGTLFMSQAGAGWPGAYASIGISNGI VDGAVQKSVYWELQRNGLSVLNANDYHV     | 1120 |
| YP_459979.1 | 1040 | LGHYRRSDGAVQPTFILGSDEKTNAPEGTLFMSQAGAGWPGAYASIGISNGI VDGAVQKSVYWELQRNGLSVLNANDYHV     | 1119 |
| 00037148.1  | 1064 | LGHYRRSDGAVQPTFILGSDEKTNAPEGTLFMSQAGAGWPGAYASIGISNGI VDGAVQKSVYWELQRNGLSVLNANDYHV     | 1143 |
| ARW58457.1  | 1041 | LGHYRRSDGAVQPTFILGSDEKTNAPEGTLFMSQAGAGWPGAYASIGISNGI VDGAVQKSVYWELQRNGLSVLNANDYHV     | 1120 |
| ABA46383.1  | 997  | LGHYRRSDGAVQPTFILGSDEKTNAPEGTLFMSQAGAGWPGAYASIGISNGI VDGAVQKSVYWELQRNGLSVLNANDYHV     | 1076 |
| YP_338198.1 | 997  | LGHYRRSDGAVQPTFILGSDEKTNAPEGTLFMSQAGAGWPGAYASIGISNGI VDGAVQKSVYWELQRNGLSVLNANDYHV     | 1076 |
| YP_512324.1 | 997  | LGHYRRSDGAVQPTFILGSDEKTNAPEGTLFMSQAGAGWPGAYASIGISNGI VDGTVQKSVYWELQRNGLSVLNANDYHV     | 1076 |
| 00037199.1  | 1099 | FYTGNGNWYFRRGKPGLYQTSLVLEDNGSDADRLPNVTLRNSRVAGYTGVIQMKSSV TQNGWGAIGNFMSPSLREYKS       | 1178 |
| 00037255.1  | 1097 | FYAGNGSWYFRRGKPGLYQTSLVVEDNSTDSLRLPNITLRNSRAAGYTGI IQVKSPVTQNGWGSVQGNFMSPSLREYKS      | 1176 |

|                             |      |                                                                                   |      |
|-----------------------------|------|-----------------------------------------------------------------------------------|------|
| <a href="#">ARW58514.1</a>  | 1110 | FYAGNGSWYFRRGKVGLYQTSLVVEDNGTSDSLRPNITLRNSRAAGYTGIIVKSPVTQNGWGSVQGNFMTPSLREYKS    | 1189 |
| <a href="#">ARW58396.1</a>  | 1121 | FYAGNGSWYFRRGKPGLYQTSLVVEDNSTDSDLRPNVTIRNSRAAGYTGVIQLKSPVTQNGWGAVQGNFMTPSLREYKS   | 1200 |
| <a href="#">AZF88360.1</a>  | 1121 | FYAGSGSWYFRRGKPGLYQTSLVVEDNSTDSDLRPNVTIRNSRAAGYTGVIQLKSPVTQNGWGAVQGNFMTPSLREYKS   | 1200 |
| <a href="#">YP_459979.1</a> | 1120 | FYAGNGNWFYFRRGKPGLYQTSLVVEDNSTDSDLRPNVTIRNSRAAGYTGVIQLKSPVTQNGWGAVQGNFMTPSLREYKS  | 1199 |
| <a href="#">Q0037148.1</a>  | 1144 | FYAGNGSWYFRRGKPGLYQTSLVLEDNGTSDSLRPNVTIRNSRAAGYTGVIQLKSSVTQNGWGAVQGNFMTPSLREYKS   | 1223 |
| <a href="#">ARW58457.1</a>  | 1121 | FYAGNGSWYFRRGKPGLYQTSLVVEDNSTDSDLRPNVTIRNSRAAGYTGVIQLKSPVTQNGWGAVQGNFMTPSLREYKS   | 1200 |
| <a href="#">ABA46383.1</a>  | 1077 | FYAGNGNWFYFRRGKPGLYQTSLVVEDNSTDSDLRPNVTIRNSRAAGYTGVIQLKSPVTQNGWGAVQGNFMTPSLREYKS  | 1156 |
| <a href="#">YP_338198.1</a> | 1077 | FYAGNGNWFYFRRGKPGLYQTSLVVEDNSTDSDLRPNVTIRNSRAAGYTGVIQLKSPVTQNGWGAVQGNFMTPSLREYKS  | 1156 |
| <a href="#">YP_512324.1</a> | 1077 | FYAGNGNWFYFRRGKPGLYQTSLVVEDNSTDSDLRPNVTIRNSRAAGYTGVIQLKSPVTQNGWGAVQGNFMTPSLREYKS  | 1156 |
| <a href="#">Q0037199.1</a>  | 1179 | NIRDVSFSALEKIRNLKIRQFNYKNAVNELYQMREEKDPNDPPLTTQDIKTYYGIVDEADEDFIDESGKGIHLYSYASI   | 1258 |
| <a href="#">Q0037255.1</a>  | 1177 | NIRDVSFSALEKIRNVRVREFNYKNAVNELYKMREEKDPNDPPLTTQDIKTYYGIVDESDEAFIDESGKGIHLYSYASL   | 1256 |
| <a href="#">ARW58514.1</a>  | 1190 | NIRDVSFSALEKIRNVRVREFNYKNAVNELYKMREEKDPNDPPLTTQDIKTYYGIVDESDEAFIDESGKGIHLYSYASL   | 1269 |
| <a href="#">ARW58396.1</a>  | 1201 | NIRDIPFSALEKIRSLKIRQFNYKNAVNELYRMREEKSPNDPPLTTEDIKTYYGIVDECDMFVDES GKG IHL YSYASI | 1280 |
| <a href="#">AZF88360.1</a>  | 1201 | NIRDIPFSALEKIRSLKIRQFNYKNAVNELYRMREEKSPNDPPLTTEDIKTYYGIVDECDMFVDES GKG IHL YSYASI | 1280 |
| <a href="#">YP_459979.1</a> | 1200 | NIRDISFSALEKIRSLKIRQFNYKNAVNELYRMREEKSPNDPPLTTEDIKTYYGIVDECDMFVDES GKG IHL YSYASI | 1279 |
| <a href="#">Q0037148.1</a>  | 1224 | NIRDISFSALEKIRSLKIRQFNYKNAVNELYRMREEKSPNDPPLTTEDIKTYYGIVDECDMFVDES GKG IHL YSYASI | 1303 |
| <a href="#">ARW58457.1</a>  | 1201 | NIRDIPFSALEKIRSLKIRQFNYKNAVNELYRMREEKSPNDPPLTTEDIKTYYGIVDECDMFVDES GKG IHL YSYASI | 1280 |
| <a href="#">ABA46383.1</a>  | 1157 | NIRDISFSALEKIRSLKIRQFNYKNAVNELYRMREEKSPNDPPLTTEDIKTYYGIVDECDMFVDES GKG IHL YSYASI | 1236 |
| <a href="#">YP_338198.1</a> | 1157 | NIRDISFSALEKIRSLKIRQFNYKNAVNELYRMREEKSPNDPPLTTEDIKTYYGIVDECDMFVDES GKG IHL YSYASI | 1236 |
| <a href="#">YP_512324.1</a> | 1157 | NIRDISFSALEKIRSLKIRQFNYKNAVNELYRMREEKSPNDPPLTTEDIKTYYGIVDECDMFVDES GKG IHL YSYASI | 1236 |
| <a href="#">Q0037199.1</a>  | 1259 | GIKGLQEVDEEVEQKVEIANLKSQVASQENRIAQLEE-LLQQLIDKKPEQP                               | 1309 |
| <a href="#">Q0037255.1</a>  | 1257 | TVKALQEV DATVQE QEGE IANLKSQVASQEDRIARLEELLQQLIDKKPEQP                            | 1308 |
| <a href="#">ARW58514.1</a>  | 1270 | TVKALQEV DATVQE QEGE IANLKSQVASQEDRIARLEELLQQLIDKKPEQP                            | 1321 |
| <a href="#">ARW58396.1</a>  | 1281 | GIKGLQEV DATVQE QEGE IANLKSQIASQEDRIARLEELLQQLINEKPEQP                            | 1332 |
| <a href="#">AZF88360.1</a>  | 1281 | GIKGLQEV DATVQE QEGE IENLKSQVASQEDRIARLEELLQQLIN K KPEQP                          | 1332 |
| <a href="#">YP_459979.1</a> | 1280 | GIKGLQEV DATVQE QEGE IANLKSQIASQEDRIARLEELLQQLIN K KPEQP                          | 1331 |
| <a href="#">Q0037148.1</a>  | 1304 | GIKGLQEV DATVQE QEGE IENLKSQVASQEDRIARLEELLQQLIDKKPEQP                            | 1355 |
| <a href="#">ARW58457.1</a>  | 1281 | GIKGLQEV DATVQE QEGE IANLKSQIASQEDRIARLEELLQQLIN K KPEQL                          | 1332 |
| <a href="#">ABA46383.1</a>  | 1237 | GIKGLQEV DATVQE QEGE IANLKSQIASQEDRIARLEELLQQLIN K KPEQP                          | 1288 |
| <a href="#">YP_338198.1</a> | 1237 | GIKGLQEV DATVQE QEGE IANLKSQIASQEDRIARLEELLQQLIN K KPEQP                          | 1288 |
| <a href="#">YP_512324.1</a> | 1237 | GIKGLQEV DATVQE QEGE IANLKSQIASQEDRIARLEELLQQLIN K KPEQP                          | 1288 |

**Figure S3.** Alignment of amino acid sequences of Tal/RBP proteins (J5a\_015 and its counterparts) of J5a, F16Ba, z1a, and other Wbeta-like bacteriophages.
